# Regulated adhesion as a driving force of gastrulation movements

Matthias Hammerschmidt<sup>1,2</sup> and Doris Wedlich<sup>3</sup>

Recent data have reinforced the fundamental role of regulated cell adhesion as a force that drives morphogenesis during gastrulation. As we discuss, cell adhesion is required for all modes of gastrulation movements in all organisms. It can even be instructive in nature, but it must be tightly and dynamically regulated. The picture that emerges from the recent findings that we review here is that different modes of gastrulation movements use the same principles of adhesion regulation, while adhesion molecules themselves coordinate the intra- and extracellular changes required for directed cell locomotion.

## Introduction

Gastrulation is the highly coordinated mass cell movement that forms diploblastic or triploblastic embryos, by which endodermal and mesodermal cells are brought into the interior of the embryo, while the ectoderm remains at the surface. One of the most puzzling findings has been that, even among vertebrates, which form rather similar body plans, very different morphogenetic cell behaviours seem to be at play during gastrulation (Keller et al., 2003; Solnica-Krezel, 2005; Wallingford et al., 2002; Wallingford and Harland, 2007). Different types of internalization movement have been distinguished: invagination, involution, ingression and epiboly. In parallel, during convergence and extension (CE), cells change their relative positions within the germ layers to form and shape the body axis. Here, we argue that, with respect to their dependence on regulated cell adhesion, all types of gastrulation movement share certain crucial features, and are much more similar than was initially acknowledged.

Cell adhesion describes the energy that is released upon binding, or, in reverse, the force that is required to separate a unit of a cell's surface from the substrate it adheres to (see Box 1 for experimental approaches to measure this force). In vivo, substrates can be either other cells or extracellular matrices (ECM). The first evidence for the importance of cell adhesion for germ layer assembly came from experiments by Johannes Holtfreter over 50 years ago. By performing in vitro dissociation and re-association assays, he and his graduate student Philip Townes showed that randomly mixed amphibian embryonic cells sort out to reconstitute the different germ layers, which often arranged in their proper anatomical relationships (Townes and Holtfreter, 1955). Steinberg hypothesized that this phenomenon, termed 'selective affinity' by Holtfreter, is caused by differential cell-cell adhesion (Steinberg, 1996; Steinberg, 2007). This assumption has been confirmed experimentally in cell culture and in the developing *Drosophila* retina by modulating the expression levels of cadherins, key regulators of cell-cell adhesion (Foty and Steinberg, 2005; Hayashi and Carthew, 2004). Cadherins are also crucially involved in regulating gastrulation in all organisms,

from flies to mice (Babb and Marrs, 2004; Ciruna and Rossant, 2001; Kühl et al., 1996; Lee and Gumbiner, 1995; Wang et al., 2004). However, as already postulated in 1976 by Albert Harris (Harris, 1976) and theoretically demonstrated by G. Wayne Brodland (Brodland, 2003), recent experimental evidence indicates that, in addition to cell adhesion, cell affinity is influenced by intracellular mechanics and cell surface tension (Krieg et al., 2008; Ninomiya and Winklbauer, 2008). Surface tension, in turn, is achieved by cortical contractions of the actomyosin system, which – possibly via a dynamic equilibrium with cadherin-catenin complexes – is physically linked to the cell membrane (Lecuit and Lenne, 2007). Cohesion – cadherin-based, homotypic adhesion among similar cells – also impinges on cell sorting by affecting group migration [see, for example Kasemeier-Kulesa et al., for the role of N-cadherin in ganglia-forming neural crest cells (Kasemeier-Kulesa et al., 2006)]. In conclusion, the extent to which differential adhesion contributes to cell sorting remains unclear, as does the extent to which cadherins contribute to differential adhesion as opposed to surface tension or cell migration. Integrins, key regulators of cell migration, have also been shown in cell culture systems to have multiple roles in cell-ECM adhesion, and in intracellular signalling and cytoskeletal regulation (Hehlhans et al., 2007), but their exact mode of action during gastrulation is less clear.

The cytoskeleton is also under the control of two cell polarity systems, planar cell polarity (PCP) and apicobasal (epithelial) cell polarity, both of which are crucial for the regulation of epithelial and mesenchymal morphogenesis during gastrulation (Dow and Humbert, 2007; Seifert and Mlodzik, 2007). These polarity systems regulate cytoskeletal dynamics via the action of small GTPases like RhoA, Rac1 and Cdc42, in order to determine cell shapes and the formation of cellular protrusions (Jaffe and Hall, 2005). Other GTPases, such as Dynamin and Rab5/Rab11, contribute to cell shape by regulating endocytosis and endosome trafficking (Jones et al., 2006). The different adhesion molecules talk not only to each other, but also to all of these intracellular systems. Regulatory instructions occur in both directions, from adhesion to the intracellular systems (outside-in signalling), and vice versa (Braga, 2002; Braga and Yap, 2005; Comoglio et al., 2003; Dow and Humbert, 2007; Hehlhans et al., 2007). Thus, adhesion molecules emerge as global players of multicellular events, modifying cell behaviour according to environmental cues, while influencing the neighbourhood of the cell according to cell-autonomous instructions.

Gastrulation is an excellent process in which to further elucidate the molecular and cellular mechanisms that contribute to this global role, and in which to test the in vivo relevance of players that have been identified in cell culture systems. Whereas previous reviews on the role of adhesion during morphogenesis were confined to particular organisms, movements or adhesion molecules (Gumbiner, 2005; Halbleib and Nelson, 2006; Lecuit, 2005a; Solnica-Krezel, 2006), we present here an updated and broader overview of the different cell-cell and cell-ECM adhesion molecules that are involved in gastrulation in different organisms, emphasizing the

<sup>1</sup>Max-Planck Institute of Immunobiology, D-79108 Freiburg, Germany. <sup>2</sup>Institute for Developmental Biology, Cologne University, D-50923 Cologne, Germany. <sup>3</sup>Zoological Institute II, University Karlsruhe (TH), D-76131 Karlsruhe, Germany.

**Box 1. Measuring the forces of adhesion**

Different approaches are used to measure adhesion between individual cells, between adhesion molecules, and between cells and ECM components. However, almost all are *in vitro* systems; even measurements between embryonic cells require their isolation and dissociation. *In vivo*, adhesion can be measured only indirectly by imaging the abundance or dynamics of adhesion molecules or complexes (Webb et al., 2003).

**Dissociation/reaggregation experiments**

In this approach, cells are dissociated and then left to reaggregate. It is often used to measure relative 'adhesiveness' between cells, because cells with higher affinity end up in the centre of reagggregates, surrounded by cells with lower affinity (Steinberg, 2007). Several variants of the assay exist, for instance, incubating cells in 'hanging drops' or re-transplanting mixed cells into embryos (Krieg et al., 2008). These assays, although similar to an *in vivo* situation, do not directly address cell-cell adhesion, as cellular aggregation is also influenced by other interdependent factors, such as cell surface tension.

**Bead adhesion assay**

In this approach, beads loaded with different, recombinantly expressed adhesion molecules and labelled with different chromophore molecules are mixed. The sorting-out behaviour of beads and final particle sizes is used as an indicator of relative adhesion affinities (Brieher et al., 1996). With these assays, direct adhesion between particular molecules is studied, without interference from other factors.

**Laminar flow adhesion assay**

In this assay, recombinantly expressed domains of adhesion proteins of choice are adsorbed to the inner surface of glass capillaries. A suspension of dissociated cells is pumped through the capillary, and attached cells are counted (Brieher et al., 1996). A variant of this assay uses coated glass slides instead of capillaries (Ogata et al., 2007; Reintsch and Hausen, 2001). Like the bead adhesion assay, these assays do not consider the influence on adhesiveness of other cell-surface molecules, which can be important *in vivo* (Chen et al., 2005; Niessen and Gumbiner, 2002).

**Dual pipette aspiration technique**

This assay measures the adhesion between two individual cells. Each cell is held fixed at the tip of a capillary by weak aspiration. Cells are brought into contact, and adhesion is determined by measuring the separation force, created by pulling one cell into the pipette by increasing aspiration, while maintaining the position of the other cell (Chu et al., 2004; Daoudi et al., 2004).

**Atomic force microscopy (AFM)**

This method measures single cell adhesion or cortical tension. The cell is mounted on a cantilever tip and is then pulled away from a substrate of choice, such as a recombinant cell adhesion molecule or a second cell adhered to a solid substrate. The adhesion force is provided by the deflection of the cantilever as the cell retracts from the surface (Krieg et al., 2008; Puech et al., 2006; Puech et al., 2005). To measure the surface tension of single cells, the target cell is deformed with a non-adherent colloidal force probe immobilized on the cantilever tip (Krieg et al., 2008).

**Laser or magnet tweezers force spectroscopy**

In the laser technique, a bead loaded with an adhesion protein is captured in the optical trap of an infrared laser. It is allowed to attach to a suitable substrate, while the optical trap is used to pull the bead apart. Magnetic tweezers use magnetic beads coated with a molecule of choice. Displacement of the bead from a suitable adhesive surface is achieved by applying an electromagnetic field. In both techniques, the adhesion force is calculated from the force required to displace the bead (Choquet et al., 1997; Neuman and Nagy, 2008).

shared and global features of their function and regulation. We focus particularly on the dynamic modulation of adhesiveness, which is relevant for epithelial and mesenchymal morphogenesis, and on the instructive role of adhesion gradients in determining the direction of cell movements.

**The different cellular modes of gastrulation movements**

In a recent review (Leptin, 2005), four major modes of cell behaviour during invertebrate and vertebrate gastrulation were distinguished. Below, we discuss these behaviours and focus on their shared features.

**Bending of coherent epithelial sheets**

The inward bending of an epithelial sheet allows large groups of cells to be translocated from the surface into the interior of an epithelial sphere. During such bending, the coherence of the cell sheet is maintained; however, cells within the sheet alter their shapes. Their apical sides constrict, driven by contractile actomyosin networks, while their lateral and basal sides become larger, probably owing to membrane trafficking (Lecuit, 2005a). Examples of epidermal bending include the invagination of the presumptive mesoderm in the ventral furrow of *Drosophila* embryos (Fig. 1A,B) (Young et al., 1991), and the formation of bottle cells during blastopore lip initiation in amphibia (Fig. 1E,F) (Lee and Harland, 2007).

**Cell rearrangements within sheets**

This mode of movement is used to change the dimensions of cell sheets or tissues. Directed lateral-to-medial cell intercalations lead to the narrowing and elongation of tissue during CE in zebrafish and *Xenopus* (Fig. 1E,G), during germ band extension in *Drosophila* (Fig. 1C,D), and during primitive streak morphogenesis before, and during, gastrulation in chicks (Lawson and Schoenwolf, 2001; Voiculescu et al., 2007). In the ectoderm of the *Drosophila* embryo and in the axial mesoderm of frogs and fish, mediolateral cell intercalations usually take place within one cell sheet per plane (planar intercalation; Fig. 1C,D) (Glickman et al., 2003; Irvine and Wieschaus, 1994; Wilson and Keller, 1991). In the presomitic (paraxial) mesoderm of zebrafish embryos, they occur in combination with radial intercalations between inner and outer layers (Yin et al., 2008). Interestingly, intercalating cells display an intrinsic anteroposterior polarity, which at least during fly gastrulation is required for proper morphogenesis (Blankenship and Wieschaus, 2001; Irvine and Wieschaus, 1994; Ninomiya et al., 2004; Yin et al., 2008; Zallen and Wieschaus, 2004). Directed radial cell intercalations from inner to outer cell layers also occur in the ectoderm/epiblast of frog and fish embryos, contributing to a thinning and spreading of these tissues during epiboly (Kane et al., 2005; Keller, 1980; Warga and Kimmel, 1990).

Intercalations in vertebrate embryos are very dynamic processes. Cells have a high protrusive activity, and cell attachments are made, dissolved and re-established very rapidly (Fig. 1G,J) (Shih and Keller, 1992a; Shih and Keller, 1992b; Voiculescu et al., 2007; von der Hardt et al., 2007). By contrast, during germ band extension in the *Drosophila* ectoderm, where cells are packed in a tight hexagonal pattern, the integrity of the epithelium is fully maintained, even though cells change their shapes and relative positions (Fig. 1D) (Bertet et al., 2004). But here, as well, adhesive junctions between neighbouring cells are dissolved and reformed, with the difference being that these changes are continuous and irreversible (Cavey et al., 2008).

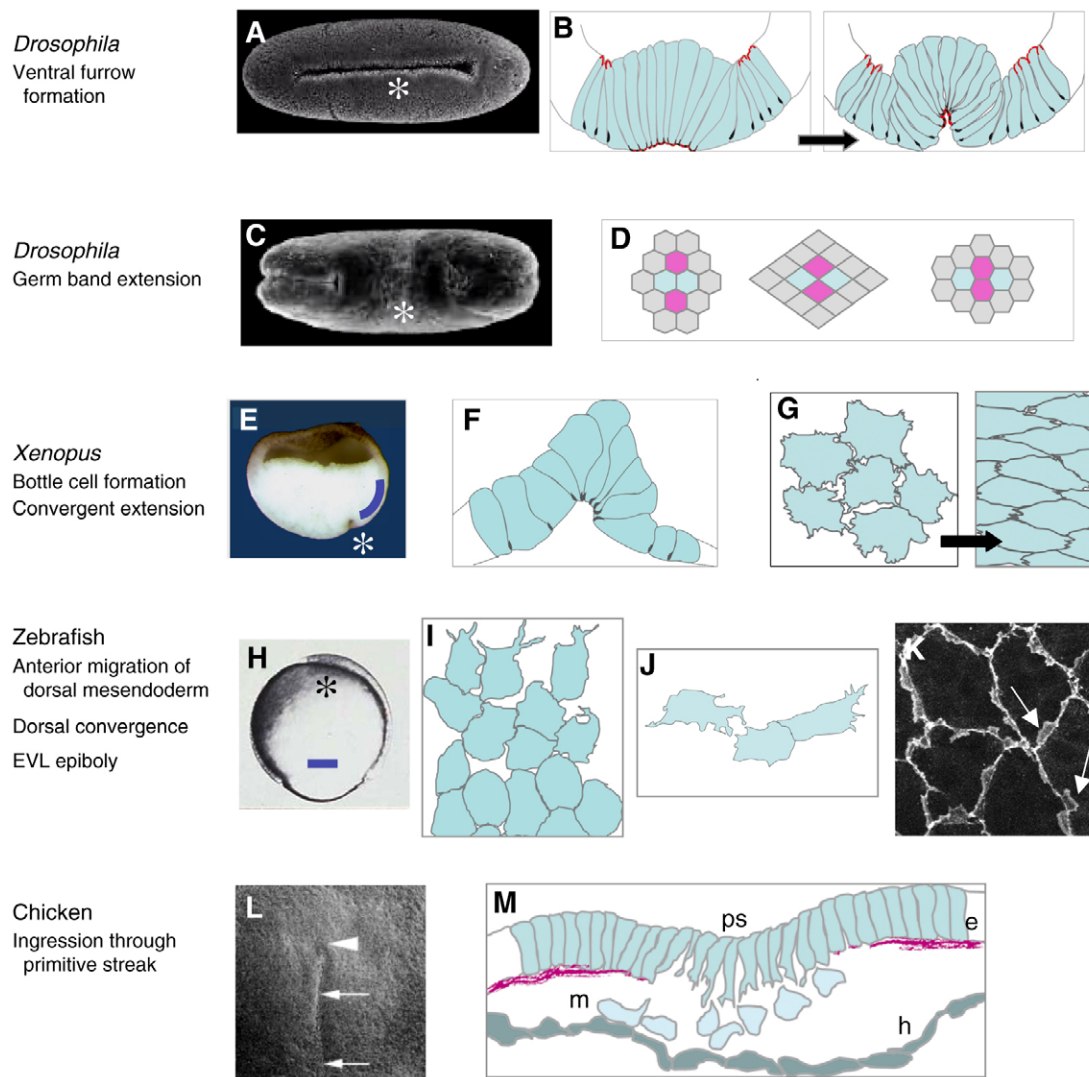

**Fig. 1. Gastrulation movements in *Drosophila*, *Xenopus* and zebrafish.** (A,B) Epithelial bending during mesoderm invagination of *Drosophila*. (A) Stage 6 scanning electron microscopic (SEM) image (ventral view, anterior to the left), courtesy of FlyBase (<http://flybase.bio.indiana.edu/>). (B) Schematic of invagination process at stages 5 (left) and 6 (right); transverse sections (TS) at level indicated by the asterisk in A, ventral side down. Red spots, RhoGEF2; black spots,  $\beta$ -catenin. Based on data from Kölsch et al. (Kölsch et al., 2007). (C,D) Germ band extension (GBE) of *Drosophila* ectoderm, driven by planar cell intercalations, without obvious, transient losses in epithelial integrity. (C) SEM image of *Drosophila* embryo at late stage of GBE (dorsal view, anterior to the left), courtesy of FlyBase. (D) Schematic of cell rearrangements at lateral side indicated by the asterisk in C. Two pairs of cells are labelled with different colours. (E-G) Bottle cell formation, a variant of epidermal bending, and convergent extension (CE) in *Xenopus*. (E) Semi-section of *Xenopus* embryo at stage 10.5 (early gastrula; dorsal to the right, animal pole up); position of the bottle cells is indicated by the asterisk, dorsal midline is indicated by the blue line. (F) Schematic of TS through forming bottle cells (dorsal side to the right, animal pole up). Black spots show the accumulation of  $\beta$ -catenin. Based on data from Lee and Harland (Lee and Harland, 2007). (G) Drawing of mesodermal cells during CE (dorsal views, animal pole up); based on data from Unterseher et al. (Unterseher et al., 2004). At early stages, cells are apolar, with protrusions multipolar (left). Later they become bi-polar and elongated along the mediolateral axis (right; dorsal midline to the right). (H-K) Zebrafish gastrulation. (H) Zebrafish embryo at 80% epiboly stage (midgastrula; lateral view, dorsal side to the right, animal pole up). Positions of cells depicted in I and J are indicated with an asterisk or a blue line, respectively. (I) Schematic of prechordal plate cells migrating towards the animal pole of zebrafish embryo (dorsal view, anterior up). Based on data from Yamashita et al. (Yamashita et al., 2004). Cells at the leading edge form protrusions that preferentially point into the direction of their migration. In following cells, protrusive activity is lower, and cells are in direct contact with each other (Montero et al., 2005). (J) Schematic of individual migrating mesodermal cells during dorsal convergence; based on data from Bakkers et al. and von der Hardt et al. (Bakkers et al., 2004; von der Hardt et al., 2007). Cells are elongated along the mediolateral axis and preferentially project cell protrusions in the dorsal/medial direction of their migration. Migrating cells often form contacts between each other, either via their protrusions (two left cells in J), or, after protrusion retraction, along larger cell surface regions (two right cells in J). (K) Phalloidin staining of the actin network in enveloping layer (EVL) cells during epiboly, when cells flatten out. Despite their tight epithelial organization, EVL cells have multiple basal lamellipodia (arrows). (L,M) Ingression of mesodermal cells through the primitive streak (PS) in chicken embryos. (L) SEM of the ventral surface of the blastoderm of a stage 3c chick embryo [reprinted, with permission, from Lawson and Schoenwolf (Lawson and Schoenwolf, 2001)]; arrowhead points to Hensen's node, arrows indicate primitive groove formed along the PS. (M) Schematic of ingressing cells through a TS of a stage 3c chick embryo PS. PS cells display protrusive activity while delaminating from the epithelial epiblast; magenta colour indicates remnants of basement membrane. e, epithelial epiblast; h, hypoblast; m, mesodermal cells; ps, primitive streak.



### Detachment of cells from cell sheets

Two types of cell detachment are distinguishable during gastrulation and both can be regarded as epithelial-to-mesenchymal transitions (EMT) (Shook and Keller, 2003). In the first, single cells delaminate from epithelia, as occurs during the ingression of mesenchymal cells in sea urchins (McClay et al., 2004) and avian embryos (Fig. 1L,M) (Lawson and Schoenwolf, 2001). In the second, parts of an, or an entire, epithelium transitions into a mesenchymal state, as occurs during the dispersal of the invaginated mesodermal tube in *Drosophila* (Leptin, 2005). During EMT, cells lose their apicobasal polarity, with the former basal side becoming the front, and the apical side the rear, of the migrating cell. In this respect, the mass ingression of mesodermal cells at the margin of the zebrafish gastrula is not a typical EMT, because the epiblast cells lack apicobasal polarity (Montero et al., 2005). However, here, as well, cell-adhesion bonds have to be broken, at least transiently.

### Cell migration

Migrating cells are characterized by the formation of cellular protrusions, such as filopodia and lamellipodia, which is driven by actin polymerization. They can also display blebs, which are formed by myosin-based contractions of cortical actin that locally increase hydrostatic pressure or induce local breaks in the cortex (Charras et al., 2005; Paluch et al., 2006; Sheetz et al., 2006). Filopodia have chemosensory roles, whereas lamellipodia and blebs ensure that a net displacement of the cytoplasm occurs in the direction of migration, thereby pushing cells forward. Although the generation of such cytoplasmic traction forces does not require much adhesion per se [but see, for example, Beningo et al. (Beningo et al., 2001)], the transient attachment of the leading edge to, and the concomitant detachment of the rear of the cell from, the substratum appear to be crucial during tail retraction to ensure efficient cell displacement (Broussard et al., 2008; Le Clainche and Carlier, 2008; Webb et al., 2002). Accordingly, lamellipodia, at least, have been shown to adhere to and/or interact with the substratum that cells move on.

During post-developmental life, cells often locomote on the ECM. In embryogenesis, however, the locomotion of cells upon one another is often observed, a process called ‘intercellular motility’ (Gumbiner, 2005). When migrating on an ECM, cells form focal adhesions with ECM components that are dynamically regulated (Broussard et al., 2008). A similarly dynamic regulation occurs during intercellular movements (see below). Examples of active migrations during gastrulation are the anteriorwards movement of the anterior dorsal mesoderm on the fibronectin-coated blastocoel roof in *Xenopus* or on the inner surface of the epiblast in zebrafish (Fig. 1I) (Montero et al., 2005; Montero and Heisenberg, 2004; Winklbauer and Nagel, 1991), or the spreading of the mesoderm after invagination and EMT on the inner surface of the ectoderm in *Drosophila* (Leptin, 2005). Lamellipodia- and bleb-driven active migration is also crucial for the dorsal convergence of lateral mesodermal cells during zebrafish gastrulation (Bakkers et al., 2004; Weiser et al., 2007). In this case, cells move on each other’s surfaces (von der Hardt et al., 2007) (Fig. 1J). Intercellular contacts (cohesion) among migrating cells also seem to be crucial for the aforementioned migration of anterior mesodermal cells during *Xenopus* and zebrafish gastrulation. Thus, they form direct cell-cell contacts (Montero et al., 2005) that are required to follow guidance cues (Winklbauer et al., 1992), and they migrate faster as large explants than as a collection of individual cells (Davidson et al., 2002). Similar group migrations are observed for many other cell types, including cancer cells during metastasis (Friedl, 2004). Cells of

the zebrafish lateral line primordium, which follow mesenchymal-like cells at the leading edge of the primordium, even need to develop epithelial-like properties and to become organized into rosettes to allow their proper displacement (Ghysen and Dambly-Chaudiere, 2007; Haas and Gilmour, 2006; Lecaudey et al., 2008). Neural crest cells also migrate collectively in ‘follow-the-leader’ chain assemblies, which require the presence of filopodial contacts between cells and RhoA activity to keep cells aligned. When cells break away from the chain, they lose their orientation (Kasemeier-Kulesa et al., 2005; Rupp and Kulesa, 2007). By contrast, primordial germ cells (PGCs), although possibly connected to each other via long cellular processes (Gomperts et al., 1994), seem to move as single cells in a cell-autonomous manner, rather than as a cohesive group (Reichman-Fried et al., 2004). However, their bleb-like protrusions (Blaser et al., 2006) might adhere to other cell types, or to the ECM, to ensure efficient forward displacement (see above). During gastrulation, individual migration through the ECM has been revealed for chicken mesodermal cells as they move away from the primitive streak after ingression (Zamir et al., 2006). However, the migrating cells do become progressively more cohesive as they move. In addition, there is a high degree of entire tissue (convective) movement, during which cells and the surrounding ECM are displaced together.

### Combined modes of cell movement

These four types of cell behaviour often occur in combination. During EMT, ingressing cells can undergo apical constrictions like those observed during epidermal bending, while simultaneously displaying basal protrusive activity to initiate cell migration (Fig. 1M) (Shook and Keller, 2003). Similarly, during vertebrate CE, cells form protrusions and migrate, while rearranging their relative positions within the tissue. Whereas CE in frogs is driven exclusively by mediolateral cell intercalations throughout the entire dorsolateral extent of the mesoderm, CE in fish can be genetically and mechanistically dissected (Bakkers et al., 2004; Glickman et al., 2003; Myers et al., 2002a; Weiser et al., 2007). Here, mediolateral intercalations appear to be restricted to the dorsal mesoderm, whereas, in lateral regions, cells undergo active cell migration. However, both movements depend on the PCP system (Solnica-Krezel, 2006), require protrusive cell activity (Bakkers et al., 2004), and involve dynamically regulated intercellular adhesive bonds (von der Hardt et al., 2007). In this respect, the active migration of lateral cells and the intercalation of more dorsal cells during zebrafish gastrulation are rather similar processes, which appear morphologically different because of differences in cell densities along the dorsoventral axis. Even during processes of epithelial morphogenesis, when epithelial integrity is maintained, cells can display rather dynamic protrusive activities at their basal sides, as for instance in the case of the zebrafish enveloping cell layer during epiboly (Fig. 1K). Together, these findings indicate that the different modes of cell movement are more similar than was initially thought.

### Key cell-adhesion molecules required for gastrulation

Adhesion is a key factor in all types of cell movement during gastrulation, during which different cell-cell and cell-ECM adhesion molecules (Table 1; Figs 2, 3) are at play. These molecules can also act independently of cell adhesion, through their ability to signal intracellularly, by which they can regulate cytoskeletal rearrangements, cell polarity and cell motility (see Table 1).

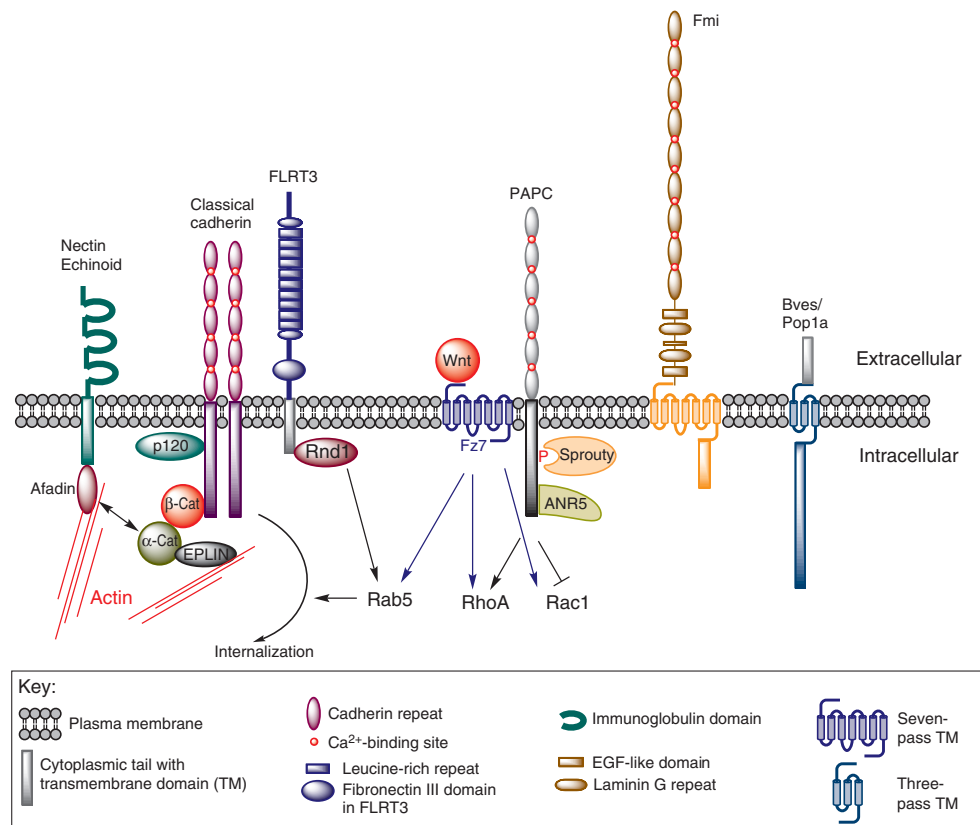

**Fig. 2. Cell-cell adhesion molecules involved in gastrulation.** Classical cadherins are integral membrane proteins characterized by five extracellular (EC) domains that mediate homophilic, trans or cis binding (Pokutta and Weis, 2007). The cytoplasmic domains of all classical cadherins contain binding sites for  $\beta$ -catenin ( $\beta$ -cat) and the catenin-relative p120, and associate with the actin cytoskeleton, possibly through Epln. They are regulated by non-canonical Wnt signalling or by the small GTPase Rnd1, which induces cadherin endocytosis in Rab5<sup>+</sup> vesicles by binding to the cytoplasmic domain of FLRT3. Protocadherins have an additional EC domain and lack cytoplasmic p120 and  $\beta$ -cat binding sites. The cytoplasmic tail of *Xenopus* paraxial protocadherin C (XPAPC) contains several other binding sites that mediate intracellular signalling and interfere with non-canonical Wnt (PCP) signalling. Flamingo (Fmi) is an atypical seven-pass transmembrane (TM) cadherin-related protein, with eight or nine EC-domains, several EGF and two Laminin G domains, and a cytoplasmic domain that mediates intracellular signalling. Ca<sup>2+</sup>-independent cell-cell adhesion molecules that are required for gastrulation movements include Bves and Echinoid. *Xenopus* and *Drosophila* Bves and Popeye family members have relatively short EC domains, a three-pass TM and a long intracellular domain (Lin et al., 2007; Ripley et al., 2006). Echinoid, a *Drosophila* nectin-like immunoglobulin cell-adhesion molecule (Ig-CAM), clusters with classical cadherins via their cytoplasmic binding partners afadin and  $\alpha$ -catenin. ANR5, ankyrin repeats domain protein 5; EGF, epidermal growth factor; Fz7, Frizzled 7.

### The cadherins

The most prominent cell-cell adhesion molecules in gastrulation are the cadherins (Table 1, Fig. 2). Both their extra- and intracellular domains are required for proper gastrulation movements (Kühl et al., 1996; Lee and Gumbiner, 1995). During *Xenopus* gastrulation, adherens junctions (AJs) formed by E-cadherin/catenin complexes are restricted to the outer ectodermal layer and contribute to the apical constriction of bottle cells (Merzdorf et al., 1998; Schneider et al., 1993). By contrast, in the coherent sheets of the involuting mesoderm, cadherins and catenins are rather uniformly distributed throughout entire cell membranes (Schneider et al., 1993). In midgastrula-stage zebrafish, however, transmission electron microscopy has revealed junctional structures between both ectodermal and mesodermal cells (Montero et al., 2005), indicating that also during mesoderm morphogenesis, close cell-cell contacts are formed.

In addition to mediating cell-cell adhesion, homophilic cadherin binding can also induce intracellular signalling; for example, via the cadherin-binding partners  $\beta$ -catenin and p120,

which can act as transcriptional regulators (Brembeck et al., 2006; Fang et al., 2004; Hosking et al., 2007), or via the small Rho-GTPases, RhoA, Rac1 and Cdc42 (Braga, 2002; Goodwin and Yap, 2004; Hogan et al., 2004; Van Aelst and Symons, 2002), which are known regulators of cytoskeletal rearrangements (Jaffe and Hall, 2005). Furthermore, Rho-GTPases can feed back to the cadherin complex, and can talk to other adhesion proteins and junctions (Braga and Yap, 2005), including components of the apicobasal polarity system (Dow and Humbert, 2007; Etienne-Manneville and Hall, 2001; Hutterer et al., 2004). Rho-GTPases, their regulators [guanine nucleotide-exchange factors (GEFs) and GTPase-activating proteins (GAPs)] and their effectors (Rok, JNK, etc.), and regulators of apicobasal polarity (Hyodo-Miura et al., 2006) are also crucial in driving cell movements during gastrulation (Choi and Han, 2002; Daggett et al., 2004; Habas et al., 2003; Kim and Han, 2007; Marlow et al., 2002; Tahinci and Symes, 2003; Tanegashima et al., 2008; Yamanaka et al., 2002). But how these molecules are regulated by classical cadherins during vertebrate gastrulation remains unknown.

**Table 1. Key cell-cell and cell-ECM adhesion molecules and their intracellular partners during gastrulation**

| Protein                                                                                              | Molecular properties                                                                                                                                                                                                                                                                                                                                                                                                                                           | Organism          | Function during gastrulation                                                                                                                                                                                                                                                                                                                                                                                                                                                |
|------------------------------------------------------------------------------------------------------|----------------------------------------------------------------------------------------------------------------------------------------------------------------------------------------------------------------------------------------------------------------------------------------------------------------------------------------------------------------------------------------------------------------------------------------------------------------|-------------------|-----------------------------------------------------------------------------------------------------------------------------------------------------------------------------------------------------------------------------------------------------------------------------------------------------------------------------------------------------------------------------------------------------------------------------------------------------------------------------|
| E-cadherin (also known as Cadherin 1)                                                                | Ca <sup>2+</sup> -dependent, homophilic trans-binding. Mediate cell-cell adhesion and are components of the AJ; link to actin cytoskeleton, possibly via catenins and eplin (Abe and Takeichi, 2008; Drees et al., 2005; Weis and Nelson, 2006). In cell culture systems, they display intracellular signalling via $\beta$ -catenin and p120, or via small Rho-GTPases (see text for details), and they interfere with GF signalling (Comoglio et al., 2003). | Mouse             | Epithelia formation (pre-gastrula stages) (Larue et al., 1994; Riethmacher et al., 1995); downregulation in mesoderm required for ingression (Arnold et al., 2008; Carver et al., 2001; Ciruna and Rossant, 2001; Nieto et al., 1994; Zohn et al., 2006).                                                                                                                                                                                                                   |
| C/XB-cadherin                                                                                        |                                                                                                                                                                                                                                                                                                                                                                                                                                                                | <i>Xenopus</i>    | Formation and maintenance of ectodermal epithelia (Levine et al., 1994).                                                                                                                                                                                                                                                                                                                                                                                                    |
| N-cadherin (also known as Cadherin 2)                                                                |                                                                                                                                                                                                                                                                                                                                                                                                                                                                | Zebrafish         | Epiboly of ectoderm; CE of ectoderm and mesoderm; cohesive anterior migration of anterior dorsal mesoderm (Babb and Marrs, 2004; Kane et al., 2005; Montero et al., 2005; Shimizu et al., 2005).                                                                                                                                                                                                                                                                            |
| Cadherin 11                                                                                          |                                                                                                                                                                                                                                                                                                                                                                                                                                                                | <i>Drosophila</i> | Epithelialization of blastoderm; AJ and monolayer maintenance in ectoderm during gastrulation; delamination of NBs during neurogenesis (Tepass et al., 1996; Wang et al., 2004); segregation and internalization of amnioserosa (Laplanche and Nilson, 2006).                                                                                                                                                                                                               |
| Paraxial protocadherin (PAPC)                                                                        | Member of protocadherin superfamily; minor cell-cell adhesiveness (Kim et al., 1998). Intracellular signalling by PAPC interferes with the PCP pathway, RhoA and Rac1 (Unterseher et al., 2004; Wang et al., 2008).                                                                                                                                                                                                                                            | <i>Xenopus</i>    | Mesoderm morphogenesis and establishment of PCP (Formstone and Mason, 2005; Kim et al., 1998; Muyskens and Kimmel, 2007; Unterseher et al., 2004; Yamamoto et al., 1998); tissue separation of <i>Xenopus</i> mesoderm and ectoderm after involution (Medina et al., 2004); paraxial expression of <i>Xenopus</i> PAPC induced by Wnt5 signalling through the Ror2 receptor (Schambony and Wedlich, 2007).                                                                  |
|                                                                                                      |                                                                                                                                                                                                                                                                                                                                                                                                                                                                | Zebrafish         |                                                                                                                                                                                                                                                                                                                                                                                                                                                                             |
| Flamingo (Fmi)                                                                                       | Atypical 7TM-cadherin; homophilic trans binding shown in vitro, relevant in some instances (Kimura et al., 2006), but not required for its role in establishing PCP (Lu et al., 1999).                                                                                                                                                                                                                                                                         | Mouse             | Celsr1 expressed in nascent mesoderm (Crompton et al., 2007); required for NT closure and PCP of inner ear hair cells (Curtin et al., 2003).                                                                                                                                                                                                                                                                                                                                |
|                                                                                                      |                                                                                                                                                                                                                                                                                                                                                                                                                                                                | Zebrafish         | Combinatorial activity of Fmi1a and Fmi1b required for CE; cooperation with Wnt11 (Formstone and Mason, 2005). Exogenous Fmi protein enriched in cell-cell contact points of converging mesodermal cells (Witzel et al., 2006).                                                                                                                                                                                                                                             |
|                                                                                                      |                                                                                                                                                                                                                                                                                                                                                                                                                                                                | <i>Drosophila</i> | Together with the atypical cadherins Dachsous and Fat, Fmi is a component of the PCP-establishing system in wings and eyes (Seifert and Mlodzik, 2007; Strutt and Strutt, 2005; Usui et al., 1999). Not known to function during <i>Drosophila</i> gastrulation.                                                                                                                                                                                                            |
| FLRT3 (Fibronectin Leucine-rich Repeat Transmembrane 3, a type 1 protein with an FN type III domain) | Homophilic binding via extracellular leucine-rich repeats, possibly accounting for cell-cell adhesions (Karaulanov et al., 2006); cytoplasmic tail binds small GTPase Rdn1 (Ogata et al., 2007), a molecule with strong anti-adhesive activity (Nobes et al., 1998; Wunnenberg-Stapleton et al., 1999).                                                                                                                                                        | <i>Xenopus</i>    | Positive regulator of FGF signalling (Böttcher et al., 2004); triggers Ca <sup>2+</sup> -dependent cell sorting in cell culture and <i>Xenopus</i> explants (Karaulanov et al., 2006); upon cytoplasmic binding of Rdn1 and cadherin binding, FLRT3 triggers Dynamin-mediated endocytosis, thereby reducing C-cadherin levels at the cell surface (Ogata et al., 2007) – might account for aforementioned Ca <sup>2+</sup> -dependence of the FLRT3 effect on cell sorting. |
| Ig-CAMs (Immunoglobulin domain-containing cell adhesion molecules)                                   | Superfamily; Ca <sup>2+</sup> -independent homophilic or heterophilic trans binding, mediate cell-cell adhesion.                                                                                                                                                                                                                                                                                                                                               | Mouse             | Afadin, the cytoplasmic binding partner of Nectin Ig-CAMs, is required for proper ectodermal organization and mesoderm migration during gastrulation (Ikeda et al., 1999).                                                                                                                                                                                                                                                                                                  |
|                                                                                                      |                                                                                                                                                                                                                                                                                                                                                                                                                                                                | Zebrafish         | Down-syndrome cell adhesion molecule (DsCAM) is required in CNS and for epiboly (Yimlamai et al., 2005).                                                                                                                                                                                                                                                                                                                                                                    |
|                                                                                                      |                                                                                                                                                                                                                                                                                                                                                                                                                                                                | <i>Drosophila</i> | Ig-CAM Echinoid, in collaboration with DEcad, regulates surface tension and apical constrictions during amnioserosa internalization and dorsal closure (Laplanche and Nilson, 2006).                                                                                                                                                                                                                                                                                        |
| Popeye                                                                                               | Small family; Ca <sup>2+</sup> -independent homophilic trans binding, possibly mediates cell-cell adhesion (Brand, 2005).                                                                                                                                                                                                                                                                                                                                      | <i>Xenopus</i>    | Popeye 1a (Bves) is required for epithelial integrity, epiboly and involution (Ripley et al., 2006).                                                                                                                                                                                                                                                                                                                                                                        |
|                                                                                                      |                                                                                                                                                                                                                                                                                                                                                                                                                                                                | <i>Drosophila</i> | Bves is possibly required for germ band extension (Lin et al., 2007).                                                                                                                                                                                                                                                                                                                                                                                                       |

Table continues on next page.

Table 1. Continued

| Protein                      | Molecular properties                                                                                                                                                                                                                                                                                                                                                                                                                                                                                                                                                     | Organism       | Function during gastrulation                                                                                                                                                                                                                                                                                                                                                                                                                                                                                                                                                                       |
|------------------------------|--------------------------------------------------------------------------------------------------------------------------------------------------------------------------------------------------------------------------------------------------------------------------------------------------------------------------------------------------------------------------------------------------------------------------------------------------------------------------------------------------------------------------------------------------------------------------|----------------|----------------------------------------------------------------------------------------------------------------------------------------------------------------------------------------------------------------------------------------------------------------------------------------------------------------------------------------------------------------------------------------------------------------------------------------------------------------------------------------------------------------------------------------------------------------------------------------------------|
| Integrins                    | TM, heteromeric receptor for ECM proteins, such as FN, collagens, laminins or fibrillins. Integrins mediate cell-ECM adhesion; are components of focal adhesions; their cytoplasmic domains bind a protein complex, consisting of Talin, Paxillin, Vinculin and $\alpha$ -actinin, linking the complex to the actin skeleton. Other complex members are the kinases FAK and ILK, and the GEFs $\alpha$ - and $\beta$ -PIX, linking the system to Rho GTPases, regulators of the actin cytoskeleton. Integrins also interfere with GF signalling (Comoglio et al., 2003). | Mouse          | $\beta$ 1 integrin, ILK and Talin mutants die shortly after implantation, with massive defects in the polarization of epiblast cells and lack of germ layer formation from the ICM (Fässler and Meyer, 1995; Monkley et al., 2000; Sakai et al., 2003; Stephens et al., 1995).                                                                                                                                                                                                                                                                                                                     |
|                              |                                                                                                                                                                                                                                                                                                                                                                                                                                                                                                                                                                          | Chick          | RhoA-dependent destabilization of integrin-based adhesion is required for basement membrane breakdown and ingression of mesodermal cells in the primitive streak (Nakaya et al., 2008).                                                                                                                                                                                                                                                                                                                                                                                                            |
|                              |                                                                                                                                                                                                                                                                                                                                                                                                                                                                                                                                                                          | <i>Xenopus</i> | <i>Xenopus</i> integrins and their FN ligand are required for the migration of anterior dorsal mesoderm on the blastocoel roof (Davidson et al., 2002; Skalski et al., 1998; Winklbauer and Keller, 1996), for radial intercalation driving epiboly (Marsden and DeSimone, 2001), and for mediolateral intercalation driving CE (Ilioka et al., 2007; Marsden and DeSimone, 2003). ILK is required for epiboly and CE, Paxillin for CE (Ilioka et al., 2007). Fibrillin is required for the 'capture' of intercalating cells at the notochord-somite border during CE (Skoglund and Keller, 2007). |
|                              |                                                                                                                                                                                                                                                                                                                                                                                                                                                                                                                                                                          | Zebrafish      | Zebrafish FN is required for proper convergence of heart precursor cells to the midline (Trinh and Stainier, 2004); mesodermal cells isolated from gastrulating zebrafish embryos adhere to FN-coated substrates in a Wnt11-dependent manner (Puech et al., 2005); zebrafish ILK and $\beta$ -PIX are required for blood vessel integrity, a laminin-dependent process, but not for gastrulation (Knoll et al., 2007; Liu et al., 2007).                                                                                                                                                           |
| <i>Drosophila</i>            | <i>Drosophila</i> integrins are not required for invagination per se (Leptin et al., 1989), but for the later migration of primordial midgut cells after EMT (Martin-Bermudo et al., 1999; Roote and Zusman, 1995).                                                                                                                                                                                                                                                                                                                                                      |                |                                                                                                                                                                                                                                                                                                                                                                                                                                                                                                                                                                                                    |
| LTBP                         | Latent TGF $\beta$ -binding protein; covalently binds proprotein of transforming growth factor (TGF) $\beta$ ; contains integrin-binding motif RGD; ligand of integrin $\alpha$ v $\beta$ 1 (Munger et al., 1998).                                                                                                                                                                                                                                                                                                                                                       | <i>Xenopus</i> | <i>Xenopus</i> LTBP1 is expressed in nascent mesoderm. LTBP1 overexpression interferes with Nodal/Activin signalling and mesoderm induction, rather than morphogenesis, suggesting that its interaction with integrin is required not for gastrulation movements, but to localize TGF $\beta$ to the cell surface (Altmann et al., 2002).                                                                                                                                                                                                                                                          |
|                              |                                                                                                                                                                                                                                                                                                                                                                                                                                                                                                                                                                          | Mouse          | LTBP1 deficient mice are viable and fertile, with moderate alterations in facial structures (Drews et al., 2008).                                                                                                                                                                                                                                                                                                                                                                                                                                                                                  |
| HSPGs (syndecans, glypicans) | Cell surface-associated HSPGs; can bind FN, possibly modulating cellular focal adhesiveness (Morgan et al., 2007). Main function is to modulate GF distribution (non-cell autonomous), or as a co-receptor of GF signalling (Fujise et al., 2003; Topczewski et al., 2001).                                                                                                                                                                                                                                                                                              | <i>Xenopus</i> | <i>Xenopus</i> Syndecan 4, in cooperation with FN, binds to Wnt receptor Frizzled 7, promoting non-canonical Wnt signalling to regulate CE movements (Munoz et al., 2006). Syndecan 2 is involved in FN matrix assembly on <i>Xenopus</i> animal cap cells. According to loss-of-function studies, it is required for signalling by the TGF $\beta$ factor Vg1, transmitting left-right information from ectoderm to migrating mesodermal cells, rather than regulating gastrulation movements (Kramer and Yost, 2002).                                                                            |
| Hyaluronan                   | Secreted linear polysaccharide of high molecular weight; ECM component; implicated in cell adhesion, migration and proliferation; structural and signalling function (Lee and Spicer, 2000).                                                                                                                                                                                                                                                                                                                                                                             | Zebrafish      | Hyaluronan-synthesizing enzyme Has2 is required for lamellipodia formation and motility of lateral mesodermal cells during convergence movements (Bakkers et al., 2004); cell-autonomous effect upstream of Rac1, pointing to a role of hyaluronan as an autocrine signal, rather than a structural component/migration substrate of the ECM; during <i>Xenopus</i> somitogenesis, CD44 could be identified as a crucial hyaluronan receptor (Ori et al., 2006); relevant receptor during zebrafish gastrulation is currently unknown.                                                             |

AJ, adherens junctions; CE, convergence and extension; CNS, central nervous system; ECM, extracellular matrix; EMT, epithelial-mesenchymal transition; FAK, focal adhesion kinase; FGF, fibroblast growth factor; GEF, guanine nucleotide-exchange factor; GF, growth factor; FN, fibronectin; HSPG, heparan sulfate proteoglycan; ICM, inner cell mass; ILK, integrin-linked kinase; NB, neuroblast; NT, neural tube; PIX, p21-activated kinase-interacting exchange factor; PCP, planar cell polarity; TM, transmembrane.



An important signalling function during gastrulation has been revealed for *Xenopus* paraxial protocadherin C (XPAPC, see Table 1). XPAPC is required for mesoderm morphogenesis and for CE movements, although its contribution to mesodermal cell-cell adhesion is minor (Kim et al., 1998). Extracellularly, it binds to the transmembrane receptor Frizzled 7 (Fz7), which is involved in non-canonical Wnt signalling (Medina et al., 2004), while its cytoplasmic tail interacts with ANR5, an ankyrin repeat-containing protein that has scaffolding functions in the cytoskeleton (Chung et al., 2007), and with Sprouty (Wang et al., 2008). Sprouty is an antagonist of FGF (fibroblast growth factor) and EGF (epidermal growth factor) signalling that inhibits CE movements during *Xenopus* gastrulation (Nutt et al., 2001; Mason et al., 2006). Sprouty also inhibits non-canonical Wnt signalling (Wang et al., 2008), and thus XPAPC might partly fulfil its CE-promoting effect by sequestering and inhibiting Sprouty (Wang et al., 2008), thereby allowing non-canonical Wnt signalling and the PCP system to become active and to activate the small GTPase Rho (Unterseher et al., 2004). In parallel, and possibly independently of PCP, XPAPC inhibits Rac1 (Unterseher et al., 2004).

In addition to XPAPC, other cadherins and  $\text{Ca}^{2+}$ -independent cell-cell adhesion molecules are involved in gastrulation. Their individual functions, however, are less well understood (for an overview, see Fig. 2 and Table 1).

### Integrin ligands and receptors

The interaction of gastrulating cells with the ECM is dominated by the ECM component fibronectin and its integrin receptors (Fig. 3). Other known integrin ligands, such as Fibrillin (see below), collagens and laminins, are strongly expressed only at the end of, or after, gastrulation. Integrins are crucial components of focal adhesions, and they regulate cell migration during development and adulthood (Bökel and Brown, 2002; Lock et al., 2008). Through cytoplasmic adapter proteins, such as Talin, they associate with the actin cytoskeleton. The binding of an ECM protein to an integrin induces a conformational change in the integrin receptor that results in the recruitment and/or activation of other associated focal adhesion proteins, such as the focal adhesion and the integrin-linked kinases FAK and ILK, scaffold proteins like Paxillin, and GEFs such as alpha- and beta-PIX (Rosenberger and Kutsche, 2006), which provide a link to the small GTPases Rac1 and Cdc24 (outside-in signalling). In reverse, the cytoplasmic binding of Talin to an integrin receptor results in a slight unclamping of the integrin subunits, which is a prerequisite for the binding of their extracellular domains to ECM proteins (inside-out signalling) (Gumbiner, 2005; Hynes, 2002). Via such a mechanism, the cortical actomyosin system could interfere with cell adhesiveness, providing a way of 'mechanosensing' the forces that are being created by the cells themselves (Bershadsky et al., 2006). Such inside-out signalling could, for instance, be important for reducing cell-matrix adhesion when blebs form during cell migration (see above).

Other proteins involved in cell-ECM interaction with reported roles during gastrulation are described in Table 1 and Fig. 3.

### How cell adhesion regulates gastrulation movements and how it is regulated itself

How do adhesion molecules regulate the different modes of gastrulation movement? We discuss this below, re-visit concepts such as selective affinity, and address more recently discovered phenomena, such as the dynamic re-modelling of cell adhesiveness and the instructive function of adhesion gradients in determining movement direction.

### Cell sorting, selective affinity and differential adhesion

Selective affinity is a well-established concept that is involved in cell sorting in multiple developmental processes. It is dependent on different, but interdependent factors, such as differential adhesion and cortical tension (see Introduction) (Lecuit and Lenne, 2007). The initial differential adhesion hypothesis formulated by Steinberg relied on the assumption that homophilic trans interactions of cadherins (e.g. E-E or N-N) at contacting cell surfaces are distinct from heterophilic interactions between different cadherin molecules (e.g. E-N). Indeed, despite their very similar structures, it appears that the  $\beta$ -strand-swapping mechanism of cadherin dimerization accounts for their strong preference for homophilic trans interactions (Chen et al., 2005; Shan et al., 2000). Cadherin concentrations at cell surfaces are also important. In particular cultures, cells sort out when they express different levels of the same cadherin, but not when they express equal levels of different cadherins (Duguay et al., 2003). Although cell sorting during several development processes has been described as being driven by the expression of different cadherins (Cortes et al., 2003; Price et al., 2002), during germ layer formation it appears to be the difference in the levels of one particular cadherin that is important. Thus, despite the switch from E- to N-cadherin expression that occurs in the developing mesoderm of *Drosophila* and in chicken and mouse embryos during EMT (Ciruna and Rossant, 2001; Hatta and Takeichi, 1986), it is primarily the loss of E-cadherin that is relevant. Upon loss of the transcription factor Snail (Barrallo-Gimeno and Nieto, 2005), or of other factors required for E-cadherin downregulation in chick or mouse, primitive streak cells retain their epithelial properties and fail to undergo EMT and ingression (Arnold et al., 2008; Carver et al., 2001; Ciruna and Rossant, 2001; Nieto et al., 1994; Zohn et al., 2006). In zebrafish, the downregulation of E-cadherin by Snail1a and Snail1b is not required for the initial steps of mesoderm internalization, but is required for the extension of the dorsal mesoderm (Blanco et al., 2007; Yamashita et al., 2004). After the ingression of cells, E-cadherin expression is specifically regained in prechordal plate cells, where it is required for their coherent movement towards the animal pole (Blanco et al., 2007; Montero et al., 2005). Upon loss of Snail1b function, E-cadherin expression is also re-initiated in more posterior axial regions, leading to a mixing of prechordal and notochordal cells (Blanco et al., 2007). Thus, it appears to be the different levels of E-cadherin that regulate the separation of these two mesodermal cell types.

Differential cadherin levels are also important in preventing mesodermal and ectodermal cells from remixing after their segregation, as for instance in Brachet's cleft of *Xenopus* embryos. This phenomenon can be nicely reproduced in an explant assay, where only mesodermal cells, but not ectodermal cells, fail to re-integrate into the non-involuting ectoderm when placed onto the inner surface of an animal cap (Wacker et al., 2000). This differential behaviour is regulated by XPAPC, which is expressed only in the involuting mesoderm, and not in the overlying ectoderm. XPAPC depletion leads to a failure in tissue separation and to defects in Brachet's cleft formation (Medina et al., 2004). To what extent this effect is due to XPAPC-mediated differential adhesion or to XPAPC signalling remains unclear. However, activation of RhoA and Jun N-terminal kinase (JNK), components of the non-canonical Wnt/PCP pathway, plays a crucial role in tissue separation (Medina et al., 2004). In addition, an alternate non-canonical Wnt signalling pathway is involved, regulating cell adhesion via protein kinase C and  $\text{Ca}^{2+}$  (Winklbauer et al., 2001).

That germ layer separation is driven by other forces in addition to differential adhesion is clear from recent studies in zebrafish, which reveal that actomyosin-dependent cell-cortex/surface tensions are



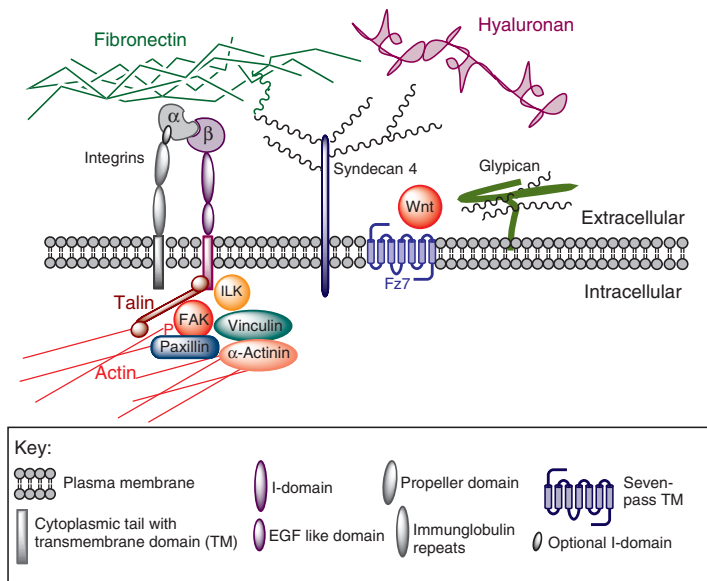

**Fig. 3. Cell-ECM adhesion molecules involved in gastrulation.**

Integrins form heterodimers composed of an  $\alpha$  and a  $\beta$  subunit. The short cytoplasmic domain of the  $\beta$ -subunit binds to the cytoskeletal protein Talin. Integrins link to the actin cytoskeleton and to actin regulators, like Rac1 and Cdc42, via Talin and other cytoplasmic proteins of the focal adhesion complex, including focal adhesion kinase (FAK) or integrin-associated kinase (ILK), the scaffold protein Paxillin, Vinculin,  $\alpha$ -actinin and others (Zaidel-Bar et al., 2007). HSPGs are categorized into the subfamilies of transmembrane syndecans, GPI-anchored glypicans and extracellular proteoglycans (Kirn-Safran et al., 2008). Syndecans can bind to fibronectin (FN), possibly modulating cellular focal adhesiveness (Morgan et al., 2007), while interfering with growth factor distribution by modifying the ECM. In reverse, FN might interfere with the growth factor co-receptor function of HSPGs at the cell surface, for instance, modulating signalling through the Wnt receptor Frizzled 7 (Fz7) (Munoz et al., 2006). Hyaluronan is a secreted linear polysaccharide of high molecular weight, but without a polypeptide chain. During zebrafish gastrulation, it seems to act as an autocrine signal, rather than as a migration substrate, activating Rac1 to induce lamellipodia formation (Bakkers et al., 2004). ECM, extracellular matrix; GPI, glycosyl phosphatidylinositol; HSPGs, heparan sulfate proteoglycans.

crucial for the sorting out of mesendodermal and ectodermal progenitor cells (Krieg et al., 2008). Ectodermal cells, which display the weakest homophilic adhesion (cohesion), but the strongest cell surface tension, end up in the center of heterotypic aggregates with mesodermal cells, indicative of a higher homophilic affinity (see also Box 1); conversely, inhibiting Myosin II contractility decreases ectodermal cell tension and inhibits sorting from mesodermal cells, without interfering with adhesiveness.

An interplay between cell adhesion and cortical contraction, involving E-cadherin and the immunoglobulin cell-adhesion molecule (Ig-CAM) Echinoid, also occurs on the dorsal side of the *Drosophila* embryo to promote the segregation and internalization of the amnioserosa during dorsal closure (Laplante and Nilson, 2006). Echinoid and its related vertebrate Ig-CAMs (nectins) associate with cadherins, with components of the epithelial cell polarity system (such as Par3), and with the cortical actin and actomyosin systems, regulating adhesiveness, surface tension and cell sorting (Lecuit, 2005b; Ogita and Takai, 2008). The same system can also trigger apical constrictions at the borders of Echinoid-positive and negative cells, contributing to epithelial bending (Laplante and Nilson, 2006; Lecuit, 2005b). Mice mutant in afadin, the cytoplasmic binding partner of nectins, display impaired mesodermal gastrulation movements, in addition to ectodermal disorganization (Ikeda et al., 1999). This suggests that the cooperation between cadherins, Ig-CAMs and the epithelial polarity system might also regulate the cytoskeletal rearrangements that drive the formation of protrusions in migrating cells.

### Effects of cell adhesiveness on cell migration

Like rock climbers, migrating cells need to grip strongly to the substratum they move on. This can be either the ECM or other cells; both act as substrata during gastrulation, sometimes in combination, requiring regulated cell-ECM and cell-cell adhesion.

### ECM-cell adhesion and cell migration

In line with the crucial role that focal adhesions play in cell migration during development and adulthood (Bökel and Brown, 2002; Lock et al., 2008), loss-of-function experiments with blocking antibodies or with antisense reagents have shown that integrins, their ligand

fibronectin, and their intracellular adapter and signalling proteins are required for different morphogenetic movements during amphibian gastrulation (for the migration of anterior dorsal mesoderm on the blastocoel roof, for the radial intercalation that drives epiboly, and for the mediolateral intercalation that drives CE). Essential roles of different members of the focal adhesion complex (FAC) have also been demonstrated in mouse, zebrafish and *Drosophila* (see Table 1). In *Xenopus* embryos, fibronectin is deposited as a fibrillar matrix that lines the blastocoel cavity, and is also found between migrating mesodermal cells (Marsden and DeSimone, 2001; Winklbauer, 1998). However, it seems that the fibronectin-integrin interaction is not required primarily for mesoderm cell adhesion to the blastocoel roof, but for cell spreading and for the formation of lamellipodia (Winklbauer and Keller, 1996). Similarly, during radial and mediolateral intercalation in *Xenopus* gastrulation, it is necessary for the proper establishment of cellular polarity (Marsden and DeSimone, 2001) and for the correct orientation of cellular protrusions (Davidson et al., 2006). Together, these data suggest that the prime function of the fibronectin-integrin interaction might not be cell-ECM adhesion per se, but the coordinated establishment of cellular and ECM polarity to facilitate cell movements through, or on the surface of, this matrix. By mechanisms not fully understood, integrin signalling also affects gastrulation movements by modulating cadherin-dependent cell-cell adhesion (Marsden and DeSimone, 2003).

### Cell-cell adhesion and migration

Classical cadherins, key mediators of intercellular adhesiveness, are required not only for the maintenance of tissue integrity, but also for tissue remodelling and cell movements during gastrulation, including cell migrations (see Table 1). Strikingly, in chimeric zebrafish embryos, migrating E-cadherin-deficient prechordal plate cells lag behind their wild-type counterparts, indicating that E-cadherin is required in the migrating cells themselves (Montero et al., 2005). It is currently unclear whether this effect is solely due to reduced cohesion, allowing migrating cells to remain together as a group, or to a reduced affinity to cells at the inner surface of the epiblast, the likely migration substratum. A role of the epiblast as a migration substratum is indicated by the multiple contacts that are observed between

mesodermal cell processes and epiblast cells in transmission electron micrographs of gastrulating zebrafish embryos (Montero et al., 2005). The migration of prechordal cells is under the chemotactic control of platelet-derived growth factor (PDGF) (Montero et al., 2003). It remains to be shown whether only the leading edge cells receive the guiding signals, while others follow by cohesion-dependent mechanisms, similar to the situation during chemokine-directed migration of the zebrafish lateral line primordium (Haas and Gilmour, 2006). In sum, these findings show that cadherin-mediated cell-cell adhesiveness is required for coherent migrations and/or migrations on cellular substrates. However, as discussed below, adhesion has to be constantly remodelled to allow these movements to occur.

### Dynamic regulation of cell adhesiveness during cell movement

As outlined above, gastrulation movements involve the migration of mesenchymal-like cells, as well as epithelial morphogenesis. Both concepts share crucial features with respect to the remodelling of cell adhesiveness. The regulation of adhesiveness can occur at transcriptional and at post-transcriptional levels, such as by proteolytic cleavage, by the endocytotic trafficking of adhesion molecules, or by interfering with the cytoplasmic components of adhesion complexes and their anchoring to the cytoskeleton.

### Remodelling of adhesion complexes during epithelial morphogenesis

During ventral furrow formation in *Drosophila* embryos, invaginating cells, while undergoing apical constrictions, remain epithelial and in close contact with each other (Fig. 1B). This cell invagination depends on DE-cadherin and its cytoplasmic partner Armadillo, the fly  $\beta$ -catenin homologue (Cox et al., 1996; Wang et al., 2004). Cadherin/Armadillo-containing adherence junctions (AJs) tether the actomyosin system to the apical cell membrane, thereby confining constrictions to the apical side (Dawes-Hoang et al., 2005). A recent study has shown that despite the persistent epithelial organization, a re-distribution of AJs themselves is required to occur (Kölsch et al., 2007). Their disassembly is under the control of the transcriptional repressor Snail (see also above), and apical re-assembly is under the control of the Twist target T48. T48 is a transmembrane protein that is localized to the apical side of ventral furrow cells shortly before invagination. Interestingly, T48 also affects the actomyosin system. It binds RhoGEF2, which in turn, via activation of Rho and Rok, activates Myosin II and the apical constrictions (Fig. 1B). During gastrulation in vertebrates, cells undergoing apical constrictions often display protrusive activities (see Fig. 1M). Interestingly, the RhoGEF2 homologue Xlfc is required for protrusive activity during CE in *Xenopus* (Kwan and Kirschner, 2005). In epiblast cells of the chick, basally localized Neuroepithelial cell-transforming gene 1 (Net1) protein, another Rho-GEF, is crucial for the maintenance of integrin-based adhesion to the underlying basement membrane; loss of basal Net1 and RhoA activity leads to basement membrane breakdown, which, together with apical constrictions, is a crucial step for subsequent EMT and for the ingression of mesodermal cells in the primitive streak (Levayer and Lecuit, 2008; Nakaya et al., 2008) (Fig. 1M). Together, these findings indicate that the components that are crucial for bringing about the above-described apical constriction of epithelial cells in flies also help to coordinate the more complex cellular events that underlie EMT and the migration of mesenchymal cells during gastrulation in vertebrates.

The progressive re-modelling of AJs within epithelial cells also drives the planar intercalation movements that occur during germ band extension in the *Drosophila* ectoderm. Here, junctions between two cells shrink, followed by an expansion of junctions with the new neighbours, but without any apparent dissociation of cells (see Fig. 1D). Two factors have been implicated in this process: Myosin II, which is specifically localized at the shrinking junctions (Bertet et al., 2004); and apicobasal polarity regulators, such as Bazooka/Par3, which are at the expanding junctions to assist atypical protein kinase c (aPKC) in balancing AJ symmetry during AJ re-assembly at the medial and lateral sides of the cell (Carthew, 2005; Harris and Peifer, 2007; Zallen and Wieschaus, 2004). Interestingly, Myosin II (Skoglund et al., 2008; Weiser et al., 2007) and components of the apicobasal polarity system are also required for cell intercalations during vertebrate gastrulation, which involve permanent cell dis- and re-associations and highly protrusive cell activities. For instance, the GTPase-activating protein ArfGAP and its physical interaction with aPKC and PAR-6 are required to confine protrusive activity to the mediolateral ends of cells, thereby allowing proper CE during *Xenopus* gastrulation (Hyodo-Miura et al., 2006).

Recent work has shown that during epithelial morphogenesis in early *Drosophila* embryos, adhesive bonds are remodelled by modulating the stabilization and immobilization of E-cadherin in the plasma membrane, employing two different actin populations (Cavey et al., 2008). In addition, it has been suggested that membrane traffic is involved (Lecuit, 2005a), similar to the endosomal recycling of E-cadherin during *Drosophila* wing epithelium morphogenesis (Classen et al., 2005) and during vertebrate gastrulation (see below).

### Regulation of cell adhesiveness during vertebrate gastrulation: endocytosis and beyond

Proteolytic cleavage of cadherins, while impinging on cell-cell adhesion in tumour cells (D'Souza-Schorey, 2005; Le et al., 1999; Yap et al., 2007), has not, as yet, been shown to be relevant for gastrulation movements. Another way in which to regulate cadherin function is by its internalization and its trafficking to and from the cell surface (Kamei et al., 1999). Cadherin endocytosis was first shown to be required for gastrulation movements in studies of the GTPase Dynamin, a key regulator of clathrin-mediated endocytosis (Warnock and Schmid, 1996). In this study, a dominant-negative version of Dynamin applied to explanted *Xenopus* animal caps caused C-cadherin to accumulate at the cell membrane, while blocking the CE movements that are normally induced in the caps by activin (Jarrett et al., 2002). Elegant recent work (Ogata et al., 2007) implicates two other proteins in Dynamin-dependent C-cadherin endocytosis: the type I transmembrane protein Fibronectin Leucine-rich Repeat Transmembrane 3 (FLRT3) (Lacy et al., 1999), and the small GTPase Rnd1 (Nobes et al., 1998; Wunnenberg-Stapleton et al., 1999). FLRT3 and Rnd1 are both induced by activin in involuting mesodermal cells, and form a complex required for the internalization of C-cadherin in Rab5-positive endosomes during *Xenopus* CE. By this mechanism, cells can undergo mediolateral intercalations and can 'slide' past one another without sacrificing tissue integrity. Similarly, the small GTPase Rab5c is required for E-cadherin endocytosis and for the dynamic regulation of cohesion during the anterior migration of prechordal plate cells in the zebrafish embryo (Ulrich et al., 2005). In this case, endocytosis depends on the non-canonical Wnt11 signal, consistent with the involvement of the PCP system in regulating E-cadherin recycling in the *Drosophila* wing (Classen et al., 2005).

It remains unclear how the endocytosis of cadherins is triggered. It is also unclear how the homophilic interactions with cadherins on adjacent cells are weakened, a necessary step for endocytosis-mediated internalization to occur. In cultured epithelial cells, E-cadherin endocytosis is triggered by its ubiquitination via the E3 ubiquitin ligase Hakai (Fujita et al., 2002), and in tumour cells, the disassembly of E-cadherin adhesion complexes is obtained via tyrosine phosphorylation of catenins through integrin signalling via focal adhesion kinase (FAK) (Imamichi and Menke, 2007). This latter mechanism could underlie the observed modulation of C-cadherin-mediated cell adhesiveness by integrins during *Xenopus* CE (Marsden and DeSimone, 2003). However, to date, no tyrosine phosphorylation of cadherins or catenins has been reported during gastrulation. In addition to post-translational modifications, less-adhesive cadherin conformations could be obtained by interactions with other transmembrane proteins, for example, with FLRT3 itself (see above) (Ogata et al., 2007), or with the protocadherin XPAPC (Chen and Gumbiner, 2006). In this way, loss of XPAPC could cause elevated C-cadherin activity and delayed blastopore closure during *Xenopus* gastrulation, a defect that can be rescued by the simultaneous partial inactivation of C-cadherin. Although it is clear that focal adhesion function can be downregulated via the proteolytic degradation of integrin ligands or of the cytoplasmic components of the FAC, it has yet to be demonstrated that gastrulating embryos display a similar internalization of integrins. In migrating cultured cells, integrins do undergo, and serve as crucial regulators of, caveolin-dependent endocytosis (Echarri et al., 2007; Jones et al., 2006). Integrin endocytosis could also regulate the availability of associated growth factors or their inhibitors (Larrain et al., 2003). Indirect evidence for the importance of the proteolysis of integrin ligands for gastrulation movements comes from recent knockdown studies of *Mmp14*, a membrane-anchored matrix metalloprotease known to degrade Fibronectin, among other ECM substrates. Zebrafish *mmp14* morphant embryos display compromised cell polarity and cell migration during CE (Coyle et al., 2008). In cell culture systems, downregulation of integrin-dependent focal adhesion can also be obtained by post-translational modifications of its associated kinase FAK or of the scaffold protein Paxillin (Broussard et al., 2008; Zaidel-Bar et al., 2007). Similar regulatory processes also seem to be relevant for gastrulation movements. In *Xenopus* embryos, non-canonical Wnt signalling induces the ubiquitination and proteasomal degradation of Paxillin in lamellipodia of intercalating cells, thereby interfering with cell polarization and CE (Iioka et al., 2007).

### Cell adhesion in determining movement direction

During gastrulation, migrating cells strictly follow navigation cues. But how is this information displayed to the cells? Chemotaxis (Dormann and Weijer, 2006) and adhesion gradients serve in directing cells during organogenesis and in adult life. For example, gradients of atypical cadherins in *Drosophila* function to orient cells during wing and eye development (Seifert and Mlodzik, 2007; Strutt and Strutt, 2005). Here, we propose that comparable events occur in gastrulation, to set up cell polarity and to determine the direction of cell movements. Furthermore, we speculate that adhesion gradients might employ similar intracellular signalling pathways to those that are later used by chemokines to reinforce the direction of cell movements.

The involvement of adhesion gradients in determining the direction of cell movements first came to light in studies of radial intercalations in the zebrafish epiblast, the main driving force of

epiboly (Kane et al., 2005; Warga and Kimmel, 1990). In order to lead to a productive spreading and thinning of the tissue, these radial intercalations have to be unidirectional, and, indeed, cells normally move only from inner to outer layers (Kane et al., 2005). In E-cadherin zebrafish mutants, however, radial intercalations occur in both directions, leading to early embryonic arrest in epiboly. This, together with the higher E-cadherin mRNA levels in outer layers, indicates that stronger E-cadherin-mediated intercellular adhesion within the outer layers of the epiblast (Kane et al., 2005), and between outer epiblast cells and the superficial cells of the enveloping layer (EVL) (Shimizu et al., 2005), is required to keep cells in the other layers and to make the movement unidirectional.

More recent data indicate that a similar mechanism directs active cell migrations during zebrafish dorsal convergence. Different mesodermal cell behaviours driving CE movements can be distinguished in lateral and dorsal regions of the gastrula embryo. In ventral-most regions of the embryo, cells do not move dorsally at all, whereas in lateral regions, they display a rather unidirectional migration and a slow net dorsal displacement. Only in paraxial regions does migration occur in straight ventral-to-dorsal paths, and dorsal convergence is fast (Solnica-Krezel, 2006). This spatial pattern also reflects the temporal course of movements of individual cells on their way from lateral regions into the dorsal axis. Interestingly, zebrafish mutant for various PCP pathway components display defects in fast and directed convergence in more dorsal regions, whereas the slow convergence in lateral regions occurs rather normally. In these lateral regions, cells seem to receive their first directional instructions by a bone morphogenetic protein (BMP) signalling gradient. BMPs are well known for their role in determining differential cell fates along the dorsoventral (DV) axis of fish and amphibian embryos (Hammerschmidt and Mullins, 2002). In addition, the BMP gradient has an independent effect on CE (Myers et al., 2002a; Myers et al., 2002b), determining the direction of movements by establishing a reverse gradient of adhesiveness, which progressively increases towards the dorsal midline (von der Hardt et al., 2007; Wallingford and Harland, 2007) (Fig. 4). But why should such a gradient direct the migration of rather loosely organized cells? Time-lapse studies with fluorescently labelled cells have revealed that the cells form transient adhesive bonds, primarily via their lamellipodial protrusions (Fig. 1J). BMP signalling and cadherin-dependent adhesiveness do not affect the polarity or stability of these lamellipodia, but rather their ability to convert subsequent lamellipodial retractions into a productive displacement of the cell. Because of the higher adhesiveness of a dorsal, compared with a ventral, neighbour of a cell, contacts made with dorsal cells are stronger. These stronger contacts might provide a better grip, and/or might induce stronger intracellular signalling and cytoskeletal activities that drive directed migration, thereby causing a net dorsal displacement (see Fig. 4). A similar mechanism might be at play during mediolateral intercalation in *Xenopus*. Consistent with such a possibility, DV differences in adhesiveness have been seen within the coherent mesodermal sheets of the *Xenopus* embryo (Reintsch and Hausen, 2001). Here, the adhesive gradient might be set up under the control of a gradient of TGF $\beta$ /activin family members, which would not only induce different anterodorsal versus posteroventral mesodermal fates (Green et al., 1992), but also regulate C-cadherin-mediated adhesiveness (Brieher and Gumbiner, 1994), thereby linking embryonic patterning with appropriate morphogenesis through directed CE movements (Howard and Smith, 1993; Ninomiya et al., 2004).



Although such adhesion gradients might be at play throughout the entire mesoderm, more dorsally, their effect is reinforced by additional systems, such as by chemoattraction brought about by Apelin. Apelin and its G-protein coupled receptor (GPCR) Agtr11b are expressed at the midline and in the lateral plate mesoderm of the zebrafish gastrula, respectively (Zeng et al., 2007). Knockdown of either leads to unidirectional CE movements throughout the dorsolateral mesoderm, similar to the defects obtained upon inactivation of the G-proteins G $\alpha$ 12 and 13, likely transducers of GPCR signalling (Lin et al., 2005). Their attraction to a dorsally confined chemokine explains why the speed of CE movements increases as cells approach the dorsal midline (Jessen et al., 2002; Sepich et al., 2005). Interestingly, in cell culture, homophilic cadherin bonds have been shown to activate phosphatidylinositol 3-kinase (PI3K) and the small GTPase Rac1, known mediators of chemokine signalling (Kovacs et al., 2002; Kraemer et al., 2007; Pang et al., 2005). In this light, it is tempting to speculate that when directional information is initially provided to cells by the adhesion gradient, the intracellular signalling systems that are activated are later used by dorsal chemokines to reinforce directed migration.

In addition to chemokine signalling, non-canonical Wnt11 signalling from paraxial regions becomes more prominent in dorsolateral regions of the zebrafish gastrula. In addition to inducing cell elongation via the PCP pathway, Wnt11 might have a direct effect on cell adhesiveness, increasing the persistence of cell contacts via membrane accumulation of Frizzled 7 and the atypical cadherin Flamingo (Witzel et al., 2006). In *Xenopus*, it has also been shown that Wnt5a signalling via the transmembrane receptor Ror2 induces the expression of XPAPC in paraxial regions of the gastrula embryo (Schambony and Wedlich, 2007). XPAPC itself has both adhesive and signalling activities (see earlier discussions and Table 1), and is required to determine the direction of mediolateral intercalations, rather than affecting the total speed of cell displacements (Unterseher et al., 2004), similar to the effects reported for BMP signalling in zebrafish (von der Hardt et al., 2007).

Further strengthening of directionality in dorsal-most regions of *Xenopus* gastrula is achieved by so-called 'boundary capturing' at the notochord-somite boundaries (Keller et al., 2003; Shih and Keller, 1992a; Shih and Keller, 1992b; Wallingford et al., 2002): although usually organized in a bipolar fashion with an equal number of locomotory processes pointing laterally and medially, protrusive activity is eliminated on the side that becomes attached to the boundary, while protrusions on the opposing side continue to pull neighbours towards the boundary. According to recent data, this long-known phenomenon can be interpreted as the effect of an extreme cell-ECM adhesion gradient, involving the integrin ligand Fibrillin, which is the earliest matrix component to be expressed at the developing notochord-somite boundary (Skoglund et al., 2006), and which is required to direct CE movements (Skoglund and Keller, 2007).

## Conclusions

Previous and recent findings suggest that, with respect to cell adhesion and its regulation, the cellular mechanisms that underlie gastrulation movements in different organisms are much more similar than was initially acknowledged. In this light, movements that at a cursory inspection appear fundamentally different and highly divergent are revealed as sharing some common underlying principles. Molecular and embryonic manipulations, combined with the new and better tools to record subcellular dynamics and to quantify cell adhesion and intracellular movement forces in vivo, will greatly facilitate our endeavours to further unravel these basic cellular mechanisms. Future

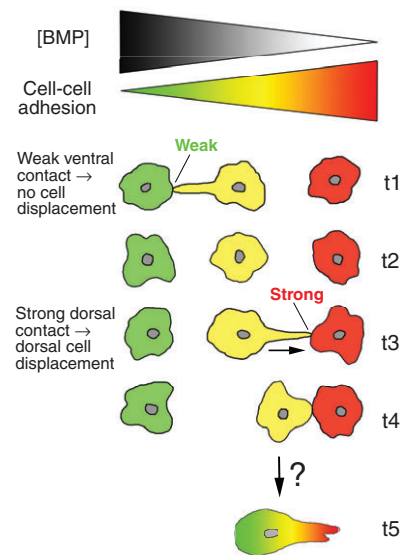

**Fig. 4. Model of how an adhesion gradient could determine the direction of cell migration during dorsal convergence in zebrafish.** The dorsoventral (DV) BMP gradient of gastrula-stage zebrafish embryos (Hammerschmidt and Mullins, 2002) leads to the establishment of a reverse gradient of Ca<sup>2+</sup>- and cadherin-dependent cell-cell adhesiveness (von der Hardt et al., 2007). Migrating lateral mesodermal cells form lamellipodia that transiently contact neighbouring cells. At the onset of dorsal convergence, lamellipodia project randomly in all directions. However, the BMP and adhesion gradients lead to differences in the "functionality" of dorsal versus ventral protrusions. In vitro measurements of adhesion forces between cells with different cadherin levels have revealed that adhesion force is determined by the partner with the lower levels (Krieg et al., 2008). Accordingly, contacts of a lateral cell (in yellow) to a ventrally located cell (in green) should be weaker than contacts to a dorsally located cell (in red). This causes a higher likelihood of dorsal versus ventral displacements of the lateral (yellow) cell body during lamellipodial retraction. The model also explains why ventral-most cells (green) do not converge at all towards the dorsal side (Solnica-Krezel, 2006). Such directional instructions by a tissue adhesion gradient might be particularly important in lateral regions of the mesoderm, giving cells initial information about medial (dorsal) versus lateral (ventral) location, and inducing a transformation from a non- or bi-polar to a mono-polar organization of cells. It is currently unclear (question mark) whether this transformation also leads to a re-distribution of adhesion molecules within cells themselves, with higher adhesiveness at the front (dorsal side), which would further enhance the efficiency of the system. t, time.

studies need to dissect further the effects of adhesion molecules on extra- and intercellular adhesion versus their effects on intracellular signalling to the cytoskeleton, and to elucidate further the cross-talk that occurs with other adhesive systems and other signalling pathways, such as those activated by growth factors and chemokines. In addition, more work needs to be done on the mechanisms that trigger the downregulation and recycling of adhesion molecules from and to the cell surface, and to characterize further the exact roles of the GTPases involved. Furthermore, systematic forward and reverse genetic screens might reveal novel adhesive proteins, or adhesion regulators and signalling components. These findings should not only deepen our understanding of gastrulation, but also provide better insights into the mechanisms that underlie human pathological conditions, such as



cancer metastasis, inflammation and epithelial wound healing, during which regulated cell-cell and cell-ECM adhesiveness play a similarly crucial role.

The photograph shown in Fig. 1E was taken in D.W.'s laboratory, the photographs shown in Fig. 1H,K by Krasimir Slanchev in M.H.'s laboratory. We are grateful to Carl-Philipp Heisenberg, Rolf Kemler, Maria Leptin and Erez Raz for their comments on previous versions of the manuscript.

## References

- Abe, K. and Takeichi, M.** (2008). EPLIN mediates linkage of the cadherin catenin complex to F-actin and stabilizes the circumferential actin belt. *Proc. Natl. Acad. Sci. USA* **105**, 13-19.
- Altmann, C. R., Chang, C., Munoz-Sanjuan, I., Bell, E., Heke, M., Rifkin, D. B. and Brivanlou, A. H.** (2002). The latent-TGFbeta-binding-protein-1 (LTBP-1) is expressed in the organizer and regulates nodal and activin signaling. *Dev. Biol.* **248**, 118-127.
- Arnold, S. J., Hofmann, U. K., Bikoff, E. K. and Robertson, E. J.** (2008). Pivotal roles for eomesodermin during axis formation, epithelium-to-mesenchyme transition and endoderm specification in the mouse. *Development* **135**, 501-511.
- Babb, S. G. and Marrs, J. A.** (2004). E-cadherin regulates cell movements and tissue formation in early zebrafish embryos. *Dev. Dyn.* **230**, 263-277.
- Bakkers, J., Kramer, C., Pothof, J., Quaedvlieg, N. E., Spaik, H. P. and Hammerschmidt, M.** (2004). Has2 is required upstream of Rac1 to govern dorsal migration of lateral cells during zebrafish gastrulation. *Development* **131**, 525-537.
- Barrallo-Gimeno, A. and Nieto, M. A.** (2005). The Snail genes as inducers of cell movement and survival: implications in development and cancer. *Development* **132**, 3151-3161.
- Beningo, K. A., Dembo, M., Kaverina, I., Small, J. V. and Wang, Y. L.** (2001). Nascent focal adhesions are responsible for the generation of strong propulsive forces in migrating fibroblasts. *J. Cell Biol.* **153**, 881-888.
- Bershadsky, A., Kozlov, M. and Geiger, B.** (2006). Adhesion-mediated mechanosensitivity: a time to experiment, and a time to theorize. *Curr. Opin. Cell Biol.* **18**, 472-481.
- Bertet, C., Sulak, L. and Lecuit, T.** (2004). Myosin-dependent junction remodelling controls planar cell intercalation and axis elongation. *Nature* **429**, 667-671.
- Blanco, M. J., Barrallo-Gimeno, A., Acloque, H., Reyes, A. E., Tada, M., Allende, M. L., Mayor, R. and Nieto, M. A.** (2007). Snail1a and Snail1b cooperate in the anterior migration of the axial mesendoderm in the zebrafish embryo. *Development* **134**, 4073-4081.
- Blankenship, J. T. and Wieschaus, E.** (2001). Two new roles for the Drosophila AP patterning system in early morphogenesis. *Development* **128**, 5129-5138.
- Blaser, H., Reichman-Fried, M., Castanon, I., Dumstrei, K., Marlow, F. L., Kawakami, K., Solnica-Krezel, L., Heisenberg, C. P. and Raz, E.** (2006). Migration of zebrafish primordial germ cells: a role for myosin contraction and cytoplasmic flow. *Dev. Cell* **11**, 613-627.
- Bökel, C. and Brown, N. H.** (2002). Integrins in development: moving on, responding to, and sticking to the extracellular matrix. *Dev. Cell* **3**, 311-321.
- Böttcher, R. T., Pollet, N., Delius, H. and Niehrs, C.** (2004). The transmembrane protein XFLRT3 forms a complex with FGF receptors and promotes FGF signalling. *Nat. Cell Biol.* **6**, 38-44.
- Braga, V. M.** (2002). Cell-cell adhesion and signalling. *Curr. Opin. Cell Biol.* **14**, 546-556.
- Braga, V. M. and Yap, A. S.** (2005). The challenges of abundance: epithelial junctions and small GTPase signalling. *Curr. Opin. Cell Biol.* **17**, 466-474.
- Brand, T.** (2005). The Popeye domain-containing gene family. *Cell Biochem. Biophys.* **43**, 95-103.
- Brembeck, F. H., Rosario, M. and Birchmeier, W.** (2006). Balancing cell adhesion and Wnt signaling, the key role of beta-catenin. *Curr. Opin. Genet. Dev.* **16**, 51-59.
- Brieher, W. M. and Gumbiner, B. M.** (1994). Regulation of C-cadherin function during actin induced morphogenesis of *Xenopus* animal caps. *J. Cell Biol.* **126**, 519-527.
- Brieher, W. M., Yap, A. S. and Gumbiner, B. M.** (1996). Lateral dimerization is required for the homophilic binding activity of C-cadherin. *J. Cell Biol.* **135**, 487-496.
- Brodland, G. W.** (2003). New information from cell aggregate compression tests and its implications for theories of cell sorting. *Biorheology* **40**, 273-277.
- Broussard, J. A., Webb, D. J. and Kaverina, I.** (2008). Asymmetric focal adhesion disassembly in motile cells. *Curr. Opin. Cell Biol.* **20**, 85-90.
- Carthew, R. W.** (2005). Adhesion proteins and the control of cell shape. *Curr. Opin. Genet. Dev.* **15**, 358-363.
- Carver, E. A., Jiang, R., Lan, Y., Oram, K. F. and Gridley, T.** (2001). The mouse snail gene encodes a key regulator of the epithelial-mesenchymal transition. *Mol. Cell. Biol.* **21**, 8184-8188.
- Cavey, M., Rauzi, M., Lenne, P. F. and Lecuit, T.** (2008). A two-tiered mechanism for stabilization and immobilization of E-cadherin. *Nature* **453**, 751-756.
- Charras, G. T., Yarrow, J. C., Horton, M. A., Mahadevan, L. and Mitchison, T. J.** (2005). Non-equilibration of hydrostatic pressure in blebbing cells. *Nature* **435**, 365-369.
- Chen, C. P., Posy, S., Ben-Shaul, A., Shapiro, L. and Honig, B. H.** (2005). Specificity of cell-cell adhesion by classical cadherins: Critical role for low-affinity dimerization through beta-strand swapping. *Proc. Natl. Acad. Sci. USA* **102**, 8531-8536.
- Chen, X. and Gumbiner, B. M.** (2006). Paraxial protocadherin mediates cell sorting and tissue morphogenesis by regulating C-cadherin adhesion activity. *J. Cell Biol.* **174**, 301-313.
- Choi, S. C. and Han, J. K.** (2002). *Xenopus* Cdc42 regulates convergent extension movements during gastrulation through Wnt/Ca2+ signaling pathway. *Dev. Biol.* **244**, 342-357.
- Choquet, D., Felsenfeld, D. P. and Sheetz, M. P.** (1997). Extracellular matrix rigidity causes strengthening of integrin-cytoskeleton linkages. *Cell* **88**, 39-48.
- Chu, Y. S., Thomas, W. A., Eder, O., Pincet, F., Perez, E., Thiery, J. P. and Dufour, S.** (2004). Force measurements in E-cadherin-mediated cell doublets reveal rapid adhesion strengthened by actin cytoskeleton remodeling through Rac and Cdc42. *J. Cell Biol.* **167**, 1183-1194.
- Chung, H. A., Yamamoto, T. S. and Ueno, N.** (2007). ANR5, an FGF target gene product, regulates gastrulation in *Xenopus*. *Curr. Biol.* **17**, 932-939.
- Ciruna, B. and Rossant, J.** (2001). FGF signaling regulates mesoderm cell fate specification and morphogenetic movement at the primitive streak. *Dev. Cell* **1**, 37-49.
- Classen, A. K., Anderson, K. I., Marois, E. and Eaton, S.** (2005). Hexagonal packing of *Drosophila* wing epithelial cells by the planar cell polarity pathway. *Dev. Cell* **9**, 805-817.
- Comoglio, P. M., Boccaccio, C. and Trusolino, L.** (2003). Interactions between growth factor receptors and adhesion molecules: breaking the rules. *Curr. Opin. Cell Biol.* **15**, 565-571.
- Cortes, F., Daggett, D., Bryson-Richardson, R. J., Neyt, C., Maule, J., Gautier, P., Hollway, G. E., Keenan, D. and Currie, P. D.** (2003). Cadherin-mediated differential cell adhesion controls slow muscle cell migration in the developing zebrafish myotome. *Dev. Cell* **5**, 865-876.
- Cox, R. T., Kirkpatrick, C. and Peifer, M.** (1996). Armadillo is required for adherens junction assembly, cell polarity, and morphogenesis during *Drosophila* embryogenesis. *J. Cell Biol.* **134**, 133-148.
- Coyle, R. C., Latimer, A. and Jessen, J. R.** (2008). Membrane-type 1 matrix metalloproteinase regulates cell migration during zebrafish gastrulation: evidence for an interaction with non-canonical Wnt signaling. *Exp. Cell Res.* **314**, 2150-2162.
- Crompton, L. A., Du Roure, C. and Rodriguez, T. A.** (2007). Early embryonic expression patterns of the mouse Flamingo and Prickle orthologues. *Dev. Dyn.* **236**, 3137-3143.
- Curtin, J. A., Quint, E., Tsipouri, V., Arkell, R. M., Cattanach, B., Copp, A. J., Henderson, D. J., Spurr, N., Stanier, P., Fisher, E. M. et al.** (2003). Mutation of *Celsr1* disrupts planar polarity of inner ear hair cells and causes severe neural tube defects in the mouse. *Curr. Biol.* **13**, 1129-1133.
- Daggett, D. F., Boyd, C. A., Gautier, P., Bryson-Richardson, R. J., Thisse, C., Thisse, B., Amacher, S. L. and Currie, P. D.** (2004). Developmentally restricted actin-regulatory molecules control morphogenetic cell movements in the zebrafish gastrula. *Curr. Biol.* **14**, 1632-1638.
- Daoudi, M., Lavergne, E., Garin, A., Tarantino, N., Debre, P., Pincet, F., Combadiere, C. and Deterre, P.** (2004). Enhanced adhesive capacities of the naturally occurring Ile249-Met280 variant of the chemokine receptor CX3CR1. *J. Biol. Chem.* **279**, 19649-19657.
- Davidson, L. A., Hoffstrom, B. G., Keller, R. and DeSimone, D. W.** (2002). Mesoderm extension and mantle closure in *Xenopus laevis* gastrulation: combined roles for integrin alpha5beta1, fibronectin, and tissue geometry. *Dev. Biol.* **242**, 109-129.
- Davidson, L. A., Marsden, M., Keller, R. and DeSimone, D. W.** (2006). Integrin alpha5beta1 and fibronectin regulate polarized cell protrusions required for *Xenopus* convergence and extension. *Curr. Biol.* **16**, 833-844.
- Dawes-Hoang, R. E., Parmar, K. M., Christiansen, A. E., Phelps, C. B., Brand, A. H. and Wieschaus, E. F.** (2005). folded gastrulation, cell shape change and the control of myosin localization. *Development* **132**, 4165-4178.
- Derycke, L. D. and Bracke, M. E.** (2004). N-cadherin in the spotlight of cell-cell adhesion, differentiation, embryogenesis, invasion and signalling. *Int. J. Dev. Biol.* **48**, 463-476.
- Dormann, D. and Weijer, C. J.** (2006). Chemotactic cell movement during Dictyostelium development and gastrulation. *Curr. Opin. Genet. Dev.* **16**, 367-373.
- Dow, L. E. and Humbert, P. O.** (2007). Polarity regulators and the control of epithelial architecture, cell migration, and tumorigenesis. *Int. Rev. Cytol.* **262**, 253-302.
- Drees, F., Pokutta, S., Yamada, S., Nelson, W. J. and Weis, W. I.** (2005). Alpha-catenin is a molecular switch that binds E-cadherin-beta-catenin and regulates actin-filament assembly. *Cell* **123**, 903-915.

- Draws, F., Knobel, S., Moser, M., Muhlack, K. G., Mohren, S., Stoll, C., Bosio, A., Gressner, A. M. and Weiskirchner, R. (2008). Disruption of the latent transforming growth factor-beta binding protein-1 gene causes alteration in facial structure and influences TGF-beta bioavailability. *Biochim. Biophys. Acta* **1783**, 34-48.
- D'Souza-Schorey, C. (2005). Disassembling adherens junctions: breaking up is hard to do. *Trends Cell Biol.* **15**, 19-26.
- Duguay, D., Foty, R. A. and Steinberg, M. S. (2003). Cadherin-mediated cell adhesion and tissue segregation: qualitative and quantitative determinants. *Dev. Biol.* **253**, 309-323.
- Echarri, A., Muriel, O. and Del Pozo, M. A. (2007). Intracellular trafficking of raft/caveolae domains: insights from integrin signaling. *Semin. Cell Dev. Biol.* **18**, 627-637.
- Etienne-Manneville, S. and Hall, A. (2001). Integrin-mediated activation of Cdc42 controls cell polarity in migrating astrocytes through PKCzeta. *Cell* **106**, 489-498.
- Fang, X., Ji, H., Kim, S. W., Park, J. I., Vaught, T. G., Anastasiadis, P. Z., Ciesiolka, M. and McCrea, P. D. (2004). Vertebrate development requires ARVCF and p120 catenins and their interplay with RhoA and Rac. *J. Cell Biol.* **165**, 87-98.
- Fässler, R. and Meyer, M. (1995). Consequences of lack of beta 1 integrin gene expression in mice. *Genes Dev.* **9**, 1896-1908.
- Formstone, C. J. and Mason, I. (2005). Combinatorial activity of Flamingo proteins directs convergence and extension within the early zebrafish embryo via the planar cell polarity pathway. *Dev. Biol.* **282**, 320-335.
- Foty, R. A. and Steinberg, M. S. (2005). The differential adhesion hypothesis: a direct evaluation. *Dev. Biol.* **278**, 255-263.
- Friedl, P. (2004). Prespecification and plasticity: shifting mechanisms of cell migration. *Curr. Opin. Cell Biol.* **16**, 14-23.
- Fujise, M., Takeo, S., Kamimura, K., Matsuo, T., Aigaki, T., Izumi, S. and Nakato, H. (2003). Dally regulates Dpp morphogen gradient formation in the *Drosophila* wing. *Development* **130**, 1515-1522.
- Fujita, Y., Krause, G., Scheffner, M., Zechner, D., Leddy, H. E., Behrens, J., Sommer, T. and Birchmeier, W. (2002). Hakai, a c-Cbl-like protein, ubiquitinates and induces endocytosis of the E-cadherin complex. *Nat. Cell Biol.* **4**, 222-231.
- Ghysen, A. and Dambly-Chaudiere, C. (2007). The lateral line microcosmos. *Genes Dev.* **21**, 2118-2130.
- Glickman, N. S., Kimmel, C. B., Jones, M. A. and Adams, R. J. (2003). Shaping the zebrafish notochord. *Development* **130**, 873-887.
- Gomperts, M., Garcia-Castro, M., Wylie, C. and Heasman, J. (1994). Interactions between primordial germ cells play a role in their migration in mouse embryos. *Development* **120**, 135-141.
- Goodwin, M. and Yap, A. S. (2004). Classical cadherin adhesion molecules: coordinating cell adhesion, signaling and the cytoskeleton. *J. Mol. Histol.* **35**, 839-844.
- Green, J. B., New, H. V. and Smith, J. C. (1992). Responses of embryonic *Xenopus* cells to activin and FGF are separated by multiple dose thresholds and correspond to distinct axes of the mesoderm. *Cell* **71**, 731-739.
- Gumbiner, B. M. (2005). Regulation of cadherin-mediated adhesion in morphogenesis. *Nat. Rev. Mol. Cell Biol.* **6**, 622-634.
- Haas, P. and Gilmour, D. (2006). Chemokine signaling mediates self-organizing tissue migration in the zebrafish lateral line. *Dev. Cell* **10**, 673-680.
- Habas, R., Dawid, I. B. and He, X. (2003). Coactivation of Rac and Rho by Wnt/Frizzled signaling is required for vertebrate gastrulation. *Genes Dev.* **17**, 295-309.
- Hadeball, B., Borchers, A. and Wedlich, D. (1998). *Xenopus* cadherin-11 (Xcadherin-11) expression requires the Wg/Wnt signal. *Mech. Dev.* **72**, 101-113.
- Halbleib, J. M. and Nelson, W. J. (2006). Cadherins in development: cell adhesion, sorting, and tissue morphogenesis. *Genes Dev.* **20**, 3199-3214.
- Hammerschmidt, M. and Mullins, M. C. (2002). Dorsoventral patterning in the zebrafish: bone morphogenetic proteins and beyond. *Results Probl. Cell Differ.* **40**, 72-95.
- Harris, A. K. (1976). Is cell sorting caused by differences in the work of intercellular adhesion? A critique of the Steinberg hypothesis. *J. Theor. Biol.* **61**, 267-285.
- Harris, T. J. and Peifer, M. (2007). aPKC controls microtubule organization to balance adherens junction symmetry and planar polarity during development. *Dev. Cell* **12**, 727-738.
- Hatta, K. and Takeichi, M. (1986). Expression of N-cadherin adhesion molecules associated with early morphogenetic events in chick development. *Nature* **320**, 447-449.
- Hayashi, T. and Carthew, R. W. (2004). Surface mechanics mediate pattern formation in the developing retina. *Nature* **431**, 647-652.
- Hehlgaans, S., Haase, M. and Cordes, N. (2007). Signalling via integrins: implications for cell survival and anticancer strategies. *Biochim. Biophys. Acta* **1775**, 163-180.
- Hogan, C., Serpente, N., Cogram, P., Hosking, C. R., Bialucha, C. U., Feller, S. M., Braga, V. M., Birchmeier, W. and Fujita, Y. (2004). Rap1 regulates the formation of E-cadherin-based cell-cell contacts. *Mol. Cell Biol.* **24**, 6690-6700.
- Hosking, C. R., Ulloa, F., Hogan, C., Ferber, E. C., Figueroa, A., Gevaert, K., Birchmeier, W., Briscoe, J. and Fujita, Y. (2007). The transcriptional repressor Gli2 is a novel binding partner for p120 catenin. *Mol. Biol. Cell* **18**, 1918-1927.
- Howard, J. E. and Smith, J. C. (1993). Analysis of gastrulation: different types of gastrulation movement are induced by different mesoderm-inducing factors in *Xenopus laevis*. *Mech. Dev.* **43**, 37-48.
- Hutterer, A., Betschinger, J., Petronczki, M. and Knoblich, J. A. (2004). Sequential roles of Cdc42, Par-6, aPKC, and Lgl in the establishment of epithelial polarity during *Drosophila* embryogenesis. *Dev. Cell* **6**, 845-854.
- Hynes, R. O. (2002). Integrins: bidirectional, allosteric signaling machines. *Cell* **110**, 673-687.
- Hyodo-Miura, J., Yamamoto, T. S., Hyodo, A. C., Iemura, S., Kusakabe, M., Nishida, E., Natsume, T. and Ueno, N. (2006). XGAP, an ArfGAP, is required for polarized localization of PAR proteins and cell polarity in *Xenopus* gastrulation. *Dev. Cell* **11**, 69-79.
- Iioka, H., Iemura, S., Natsume, T. and Kinoshita, N. (2007). Wnt signalling regulates paxillin ubiquitination essential for mesodermal cell motility. *Nat. Cell Biol.* **9**, 813-821.
- Ikeda, W., Nakanishi, H., Miyoshi, J., Mandai, K., Ishizaki, H., Tanaka, M., Togawa, A., Takahashi, K., Nishioka, H., Yoshida, H. et al. (1999). Afadin: a key molecule essential for structural organization of cell-cell junctions of polarized epithelia during embryogenesis. *J. Cell Biol.* **146**, 1117-1132.
- Imamichi, Y. and Menke, A. (2007). Signaling pathways involved in collagen-induced disruption of the E-cadherin complex during epithelial-mesenchymal transition. *Cells Tissues Organs* **185**, 180-190.
- Irvine, K. D. and Wieschaus, E. (1994). Cell intercalation during *Drosophila* germband extension and its regulation by pair-rule segmentation genes. *Development* **120**, 827-841.
- Jaffe, A. B. and Hall, A. (2005). Rho GTPases: biochemistry and biology. *Annu. Rev. Cell Dev. Biol.* **21**, 247-269.
- Jarrett, O., Stow, J. L., Yap, A. S. and Key, B. (2002). Dynamin-dependent endocytosis is necessary for convergent-extension movements in *Xenopus* animal cap explants. *Int. J. Dev. Biol.* **46**, 467-473.
- Jessen, J. R., Topczewski, J., Bingham, S., Sepich, D. S., Marlow, F., Chandrasekhar, A. and Solnica-Krezel, L. (2002). Zebrafish trilobite identifies new roles for Strabismus in gastrulation and neuronal movements. *Nat. Cell Biol.* **4**, 610-615.
- Jones, M. C., Caswell, P. T. and Norman, J. C. (2006). Endocytic recycling pathways: emerging regulators of cell migration. *Curr. Opin. Cell Biol.* **18**, 549-557.
- Kamei, T., Matozaki, T., Sakisaka, T., Kodama, A., Yokoyama, S., Peng, Y. F., Nakano, K., Takaishi, K. and Takai, Y. (1999). Coendocytosis of cadherin and c-Met coupled to disruption of cell-cell adhesion in MDCK cells - regulation by Rho, Rac and Rab small G proteins. *Oncogene* **18**, 6776-6784.
- Kane, D. A., McFarland, K. N. and Warga, R. M. (2005). Mutations in half baked/E-cadherin block cell behaviors that are necessary for teleost epiboly. *Development* **132**, 1105-1116.
- Karaulanov, E. E., Bottcher, R. T. and Niehrs, C. (2006). A role for fibronectin-leucine-rich transmembrane cell-surface proteins in homotypic cell adhesion. *EMBO Rep.* **7**, 283-290.
- Kasemeier-Kulesa, J. C., Kulesa, P. M. and Lefcort, F. (2005). Imaging neural crest cell dynamics during formation of dorsal root ganglia and sympathetic ganglia. *Development* **132**, 235-245.
- Kasemeier-Kulesa, J. C., Bradley, R., Pasquale, E. B., Lefcort, F. and Kulesa, P. M. (2006). Eph/ephrins and N-cadherin coordinate to control the pattern of sympathetic ganglia. *Development* **133**, 4839-4847.
- Keller, R. E. (1980). The cellular basis of epiboly: an SEM study of deep-cell rearrangement during gastrulation in *Xenopus laevis*. *J. Embryol. Exp. Morphol.* **60**, 201-234.
- Keller, R., Davidson, L. A. and Shook, D. R. (2003). How we are shaped: the biomechanics of gastrulation. *Differentiation* **71**, 171-205.
- Kim, G. H. and Han, J. K. (2007). Essential role for beta-arrestin 2 in the regulation of *Xenopus* convergent extension movements. *EMBO J.* **26**, 2513-2526.
- Kim, S. H., Yamamoto, A., Bouwmeester, T., Agius, E. and Robertis, E. M. (1998). The role of paraxial protocadherin in selective adhesion and cell movements of the mesoderm during *Xenopus* gastrulation. *Development* **125**, 4681-4690.
- Kimura, H., Usui, T., Tsubouchi, A. and Uemura, T. (2006). Potential dual molecular interaction of the *Drosophila* 7-pass transmembrane cadherin Flamingo in dendritic morphogenesis. *J. Cell Sci.* **119**, 1118-1129.
- Kirn-Safran, C. B., D'Souza, S. S. and Carlson, D. D. (2008). Heparan sulfate proteoglycans and their binding proteins in embryo implantation and placentalation. *Semin. Cell Dev. Biol.* **19**, 187-193.
- Knoll, R., Postel, R., Wang, J., Kratzner, R., Hennecke, G., Vacaru, A. M., Vakeel, P., Schubert, C., Murthy, K., Rana, B. K. et al. (2007). Laminin-alpha4 and integrin-linked kinase mutations cause human cardiomyopathy via simultaneous defects in cardiomyocytes and endothelial cells. *Circulation* **116**, 515-525.
- Kölsch, V., Seher, T., Fernandez-Ballester, G. J., Serrano, L. and Leptin, M.

- (2007). Control of *Drosophila* gastrulation by apical localization of adherens junctions and RhoGEF2. *Science* **315**, 384-386.
- Kovacs, E. M., Ali, R. G., McCormack, A. J. and Yap, A. S.** (2002). E-cadherin homophilic ligation directly signals through Rac and phosphatidylinositol 3-kinase to regulate adhesive contacts. *J. Biol. Chem.* **277**, 6708-6718.
- Kraemer, A., Goodwin, M., Verma, S., Yap, A. S. and Ali, R. G.** (2007). Rac is a dominant regulator of cadherin-directed actin assembly that is activated by adhesive ligation independently of Tiam1. *Am. J. Physiol., Cell Physiol.* **292**, C1061-C1069.
- Kramer, K. L. and Yost, H. J.** (2002). Ectodermal syndecan-2 mediates left-right axis formation in migrating mesoderm as a cell-nonautonomous Vg1 cofactor. *Dev. Cell* **2**, 115-124.
- Krieg, M., Arboleda-Estudillo, Y., Puech, P. H., Kafer, J., Graner, F., Muller, D. J. and Heisenberg, C. P.** (2008). Tensile forces govern germ-layer organization in zebrafish. *Nat. Cell Biol.* **10**, 429-436.
- Kühl, M., Finnemann, S., Binder, O. and Wedlich, D.** (1996). Dominant negative expression of a cytoplasmically deleted mutant of XB/U-cadherin disturbs mesoderm migration during gastrulation in *Xenopus laevis*. *Mech. Dev.* **54**, 71-82.
- Kwan, K. M. and Kirschner, M. W.** (2005). A microtubule-binding Rho-GEF controls cell morphology during convergent extension of *Xenopus laevis*. *Development* **132**, 4599-4610.
- Lacy, S. E., Bonnemann, C. G., Buzney, E. A. and Kunkel, L. M.** (1999). Identification of FLRT1, FLRT2, and FLRT3: a novel family of transmembrane leucine-rich repeat proteins. *Genomics* **62**, 417-426.
- Lapante, C. and Nilson, L. A.** (2006). Differential expression of the adhesion molecule Echinoid drives epithelial morphogenesis in *Drosophila*. *Development* **133**, 3255-3264.
- Larrain, J., Brown, C. and De Robertis, E. M.** (2003). Integrin- $\alpha$ 3 mediates binding of Chordin to the cell surface and promotes its endocytosis. *EMBO Rep.* **4**, 813-818.
- Larue, L., Ohsugi, M., Hirchenhain, J. and Kemler, R.** (1994). E-cadherin null mutant embryos fail to form a trophectoderm epithelium. *Proc. Natl. Acad. Sci. USA* **91**, 8263-8267.
- Lawson, A. and Schoenwolf, G. C.** (2001). New insights into critical events of avian gastrulation. *Anat. Rec.* **262**, 238-252.
- Le, T. L., Yap, A. S. and Stow, J. L.** (1999). Recycling of E-cadherin: a potential mechanism for regulating cadherin dynamics. *J. Cell Biol.* **146**, 219-232.
- Lecaudey, V., Cakan-Akdogan, G., Norton, W. H. and Gilmour, D.** (2008). Dynamic Fgf signaling couples morphogenesis and migration in the zebrafish lateral line primordium. *Development* **135**, 2695-2705.
- Le Clainche, C. and Carlier, M. F.** (2008). Regulation of actin assembly associated with protrusion and adhesion in cell migration. *Physiol. Rev.* **88**, 489-513.
- Lecuit, T.** (2005a). Adhesion remodeling underlying tissue morphogenesis. *Trends Cell Biol.* **15**, 34-42.
- Lecuit, T.** (2005b). Cell adhesion: sorting out cell mixing with echinoid? *Curr. Biol.* **15**, R505-R507.
- Lecuit, T. and Lenne, P. F.** (2007). Cell surface mechanics and the control of cell shape, tissue patterns and morphogenesis. *Nat. Rev. Mol. Cell Biol.* **8**, 633-644.
- Lee, C. H. and Gumbiner, B. M.** (1995). Disruption of gastrulation movements in *Xenopus* by a dominant-negative mutant for C-cadherin. *Dev. Biol.* **171**, 363-373.
- Lee, J. Y. and Harland, R. M.** (2007). Actomyosin contractility and microtubules drive apical constriction in *Xenopus* bottle cells. *Dev. Biol.* **311**, 40-52.
- Lee, J. Y. and Spicer, A. P.** (2000). Hyaluronan: a multifunctional, megaDalton, stealth molecule. *Curr. Opin. Cell Biol.* **12**, 581-586.
- Leptin, M.** (2005). Gastrulation movements: the logic and the nuts and bolts. *Dev. Cell* **8**, 305-320.
- Leptin, M., Bogaert, T., Lehmann, R. and Wilcox, M.** (1989). The function of PS integrins during *Drosophila* embryogenesis. *Cell* **56**, 401-408.
- Levayer, R. and Lecuit, T.** (2008). Breaking down EMT. *Nat. Cell Biol.* **10**, 757-759.
- Levine, E., Lee, C. H., Kintner, C. and Gumbiner, B. M.** (1994). Selective disruption of E-cadherin function in early *Xenopus* embryos by a dominant negative mutant. *Development* **120**, 901-909.
- Lin, F., Sepich, D. S., Chen, S., Topczewski, J., Yin, C., Solnica-Krezel, L. and Hamm, H.** (2005). Essential roles of G $\alpha$ <sub>12/13</sub> signaling in distinct cell behaviors driving zebrafish convergence and extension gastrulation movements. *J. Cell Biol.* **169**, 777-787.
- Lin, S., Zhao, D. and Bownes, M.** (2007). Blood vessel/epicardial substance (bves) expression, essential for embryonic development, is down regulated by Grk/EFGR signalling. *Int. J. Dev. Biol.* **51**, 37-44.
- Liu, J., Fraser, S. D., Faloon, P. W., Rollins, E. L., Vom Berg, J., Starovic-Subota, O., Laliberte, A. L., Chen, J. N., Serluca, F. C. and Childs, S. J.** (2007). A betaPix Pak2a signaling pathway regulates cerebral vascular stability in zebrafish. *Proc. Natl. Acad. Sci. USA* **104**, 13990-13995.
- Lock, J. G., Wehrle-Haller, B. and Stromblad, S.** (2008). Cell-matrix adhesion complexes: master control machinery of cell migration. *Semin. Cancer Biol.* **18**, 65-76.
- Lu, B., Usui, T., Uemura, T., Jan, L. and Jan, Y. N.** (1999). Flamingo controls the planar polarity of sensory bristles and asymmetric division of sensory organ precursors in *Drosophila*. *Curr. Biol.* **9**, 1247-1250.
- Marlow, F., Topczewski, J., Sepich, D. and Solnica-Krezel, L.** (2002). Zebrafish Rho kinase 2 acts downstream of Wnt11 to mediate cell polarity and effective convergence and extension movements. *Curr. Biol.* **12**, 876-884.
- Marsden, M. and DeSimone, D. W.** (2001). Regulation of cell polarity, radial intercalation and epiboly in *Xenopus*: novel roles for integrin and fibronectin. *Development* **128**, 3635-3647.
- Marsden, M. and DeSimone, D. W.** (2003). Integrin-ECM interactions regulate cadherin-dependent cell adhesion and are required for convergent extension in *Xenopus*. *Curr. Biol.* **13**, 1182-1191.
- Martin-Bermudo, M. D., Alvarez-Garcia, I. and Brown, N. H.** (1999). Migration of the *Drosophila* primordial midgut cells requires coordination of diverse PS integrin functions. *Development* **126**, 5161-5169.
- Mason, J. M., Morrison, D. J., Basson, M. A. and Licht, J. D.** (2006). Sprouty proteins: multifaceted negative-feedback regulators of receptor tyrosine kinase signaling. *Trends Cell Biol.* **16**, 45-54.
- McClay, D. R., Gross, J. M., Range, R., Peterson, R. E. and Bradham, C.** (2004). Sea urchin gastrulation. In *Gastrulation: From Cells to Embryos* (ed. C. D. Stern), pp. 123-128. New York: Cold Spring Harbor Press.
- Medina, A., Swain, R. K., Kuerner, K. M. and Steinbeisser, H.** (2004). *Xenopus* paraxial protocadherin has signaling functions and is involved in tissue separation. *EMBO J.* **23**, 3249-3258.
- Merzdorf, C. S., Chen, Y. H. and Goodenough, D. A.** (1998). Formation of functional tight junctions in *Xenopus* embryos. *Dev. Biol.* **195**, 187-203.
- Monkley, S. J., Zhou, X. H., Kinston, S. J., Giblett, S. M., Hemmings, L., Priddle, H., Brown, J. E., Pritchard, C. A., Critchley, D. R. and Fässler, R.** (2000). Disruption of the talin gene arrests mouse development at the gastrulation stage. *Dev. Dyn.* **219**, 560-574.
- Montero, J. A. and Heisenberg, C. P.** (2004). Gastrulation dynamics: cells move into focus. *Trends Cell Biol.* **14**, 620-627.
- Montero, J. A., Kilian, B., Chan, J., Bayliss, P. E. and Heisenberg, C. P.** (2003). Phosphoinositide 3-kinase is required for process outgrowth and cell polarization of gastrulating mesodermal cells. *Curr. Biol.* **13**, 1279-1289.
- Montero, J. A., Carvalho, L., Wilsch-Brauninger, M., Kilian, B., Mustafa, C. and Heisenberg, C. P.** (2005). Shield formation at the onset of zebrafish gastrulation. *Development* **132**, 1187-1198.
- Morgan, M. R., Humphries, M. J. and Bass, M. D.** (2007). Synergistic control of cell adhesion by integrins and syndecans. *Nat. Rev. Mol. Cell Biol.* **8**, 957-969.
- Munger, J. S., Harpel, J. G., Giancotti, F. G. and Rifkin, D. B.** (1998). Interactions between growth factors and integrins: latent forms of transforming growth factor-beta are ligands for the integrin  $\alpha$ v $\beta$ 1. *Mol. Biol. Cell* **9**, 2627-2638.
- Munoz, R., Moreno, M., Oliva, C., Orbenes, C. and Larrain, J.** (2006). Syndecan-4 regulates non-canonical Wnt signalling and is essential for convergent and extension movements in *Xenopus* embryos. *Nat. Cell Biol.* **8**, 492-500.
- Muyskens, J. B. and Kimmel, C. B.** (2007). Tbx16 cooperates with Wnt11 in assembling the zebrafish organizer. *Mech. Dev.* **124**, 35-42.
- Myers, D. C., Sepich, D. S. and Solnica-Krezel, L.** (2002a). Bmp activity gradient regulates convergent extension during zebrafish gastrulation. *Dev. Biol.* **243**, 81-98.
- Myers, D. C., Sepich, D. S. and Solnica-Krezel, L.** (2002b). Convergence and extension in vertebrate gastrulae: cell movements according to or in search of identity? *Trends Genet.* **18**, 447-455.
- Nakaya, Y., Sukowati, E. W., Wu, Y. and Sheng, G.** (2008). RhoA and microtubule dynamics control cell-basement membrane interaction in EMT during gastrulation. *Nat. Cell Biol.* **10**, 765-775.
- Neuman, K. C. and Nagy, A.** (2008). Single-molecule force spectroscopy: optical tweezers, magnetic tweezers and atomic force microscopy. *Nat. Methods* **5**, 491-505.
- Niessen, C. M. and Gumbiner, B. M.** (2002). Cadherin-mediated cell sorting not determined by binding or adhesion specificity. *J. Cell Biol.* **156**, 389-399.
- Nieto, M. A., Sargent, M. G., Wilkinson, D. G. and Cooke, J.** (1994). Control of cell behavior during vertebrate development by Slug, a zinc finger gene. *Science* **264**, 835-839.
- Ninomiya, H. and Winklbauer, R.** (2008). Epithelial coating controls mesenchymal shape change through tissue-positioning effects and reduction of surface-minimizing tension. *Nat. Cell Biol.* **10**, 61-69.
- Ninomiya, H., Elinson, R. P. and Winklbauer, R.** (2004). Antero-posterior tissue polarity links mesoderm convergent extension to axial patterning. *Nature* **430**, 364-367.
- Nobes, C. D., Lauritzen, I., Mattei, M. G., Paris, S., Hall, A. and Chardin, P.** (1998). A new member of the Rho family, Rnd1, promotes disassembly of actin filament structures and loss of cell adhesion. *J. Cell Biol.* **141**, 187-197.
- Nutt, S. L., Dingwell, K. S., Holt, C. E. and Amaya, E.** (2001). *Xenopus* Sprouty2 inhibits FGF-mediated gastrulation movements but does not affect mesoderm induction and patterning. *Genes Dev.* **15**, 1152-1166.
- Ogata, S., Morokuma, J., Hayata, T., Kolle, G., Niehrs, C., Ueno, N. and Cho,**



- K. W. (2007). TGF-beta signaling-mediated morphogenesis: modulation of cell adhesion via cadherin endocytosis. *Genes Dev.* **21**, 1817-1831.
- Ogita, H. and Takai, Y. (2008). Cross-talk among integrin, cadherin, and growth factor receptor: roles of nectin and nectin-like molecule. *Int. Rev. Cytol.* **265**, 1-54.
- Ori, M., Nardini, M., Casini, P., Perris, R. and Nardi, I. (2006). XHas2 activity is required during somitogenesis and precursor cell migration in *Xenopus* development. *Development* **133**, 631-640.
- Paluch, E., Sykes, C., Prost, J. and Bornens, M. (2006). Dynamic modes of the cortical actomyosin gel during cell locomotion and division. *Trends Cell Biol.* **16**, 5-10.
- Pang, J. H., Kraemer, A., Stehbens, S. J., Frame, M. C. and Yap, A. S. (2005). Recruitment of phosphoinositide 3-kinase defines a positive contribution of tyrosine kinase signaling to E-cadherin function. *J. Biol. Chem.* **280**, 3043-3050.
- Pokutta, S. and Weis, W. I. (2007). Structure and mechanism of cadherins and catenins in cell-cell contacts. *Annu. Rev. Cell Dev. Biol.* **23**, 237-261.
- Price, S. R., De Marco Garcia, N. V., Ranscht, B. and Jessell, T. M. (2002). Regulation of motor neuron pool sorting by differential expression of type II cadherins. *Cell* **109**, 205-216.
- Puech, P. H., Taubenberger, A., Ulrich, F., Krieg, M., Muller, D. J. and Heisenberg, C. P. (2005). Measuring cell adhesion forces of primary gastrulating cells from zebrafish using atomic force microscopy. *J. Cell Sci.* **118**, 4199-4206.
- Puech, P. H., Poole, K., Knebel, D. and Muller, D. J. (2006). A new technical approach to quantify cell-cell adhesion forces by AFM. *Ultramicroscopy* **106**, 637-644.
- Reichman-Fried, M., Minina, S. and Raz, E. (2004). Autonomous modes of behavior in primordial germ cell migration. *Dev. Cell* **6**, 589-596.
- Reintsch, W. E. and Hausen, P. (2001). Dorsoventral differences in cell-cell interactions modulate the motile behaviour of cells from the *Xenopus* gastrula. *Dev. Biol.* **240**, 387-403.
- Riethmacher, D., Brinkmann, V. and Birchmeier, C. (1995). A targeted mutation in the mouse E-cadherin gene results in defective preimplantation development. *Proc. Natl. Acad. Sci. USA* **92**, 855-859.
- Ripley, A. N., Osler, M. E., Wright, C. V. and Bader, D. (2006). Xbvcs is a regulator of epithelial movement during early *Xenopus laevis* development. *Proc. Natl. Acad. Sci. USA* **103**, 614-619.
- Roote, C. E. and Zusman, S. (1995). Functions for PS integrins in tissue adhesion, migration, and shape changes during early embryonic development in *Drosophila*. *Dev. Biol.* **169**, 322-336.
- Rosenberger, G. and Kutsche, K. (2006). AlphaPIX and betaPIX and their role in focal adhesion formation. *Eur. J. Cell Biol.* **85**, 265-274.
- Rupp, P. A. and Kulesa, P. M. (2007). A role for RhoA in the two-phase migratory pattern of post-otic neural crest cells. *Dev. Biol.* **311**, 159-171.
- Sakai, T., Li, S., Docheva, D., Grashoff, C., Sakai, K., Kostka, G., Braun, A., Pfeifer, A., Yurchenco, P. D. and Fässler, R. (2003). Integrin-linked kinase (ILK) is required for polarizing the epiblast, cell adhesion, and controlling actin accumulation. *Genes Dev.* **17**, 926-940.
- Schambony, A. and Wedlich, D. (2007). Wnt-5A/Ror2 regulate expression of XPAPC through an alternative noncanonical signaling pathway. *Dev. Cell* **12**, 779-792.
- Schneider, S., Herrenknecht, K., Butz, S., Kemler, R. and Hausen, P. (1993). Catenins in *Xenopus* embryogenesis and their relation to the cadherin-mediated cell-cell adhesion system. *Development* **118**, 629-640.
- Seifert, J. R. and Mlodzik, M. (2007). Frizzled/PCP signalling: a conserved mechanism regulating cell polarity and directed motility. *Nat. Rev. Genet.* **8**, 126-138.
- Sepich, D. S., Calmelet, C., Kiskowski, M. and Solnica-Krezel, L. (2005). Initiation of convergence and extension movements of lateral mesoderm during zebrafish gastrulation. *Dev. Dyn.* **234**, 279-292.
- Shan, W. S., Tanaka, H., Phillips, G. R., Arndt, K., Yoshida, M., Colman, D. R. and Shapiro, L. (2000). Functional cis-heterodimers of N- and R-cadherins. *J. Cell Biol.* **148**, 579-590.
- Sheetz, M. P., Sable, J. E. and Dobereiner, H. G. (2006). Continuous membrane-cytoskeleton adhesion requires continuous accommodation to lipid and cytoskeleton dynamics. *Annu. Rev. Biophys. Biomol. Struct.* **35**, 417-434.
- Shih, J. and Keller, R. (1992a). Cell motility driving mediolateral intercalation in explants of *Xenopus laevis*. *Development* **116**, 901-914.
- Shih, J. and Keller, R. (1992b). Patterns of cell motility in the organizer and dorsal mesoderm of *Xenopus laevis*. *Development* **116**, 915-930.
- Shimizu, T., Yabe, T., Muraoka, O., Yonemura, S., Aramaki, S., Hatta, K., Bae, Y. K., Nojima, H. and Hibi, M. (2005). E-cadherin is required for gastrulation cell movements in zebrafish. *Mech. Dev.* **122**, 747-763.
- Shook, D. and Keller, R. (2003). Mechanisms, mechanics and function of epithelial-mesenchymal transitions in early development. *Mech. Dev.* **120**, 1351-1383.
- Skalski, M., Alfandari, D. and Darribere, T. (1998). A key function for alfav containing integrins in mesodermal cell migration during *Pleurodeles waltl* gastrulation. *Dev. Biol.* **195**, 158-173.
- Skoglund, P. and Keller, R. (2007). *Xenopus* fibrillin regulates directed convergence and extension. *Dev. Biol.* **301**, 404-416.
- Skoglund, P., Dzamba, B., Coffman, C. R., Harris, W. A. and Keller, R. (2006). *Xenopus* fibrillin is expressed in the organizer and is the earliest component of matrix at the developing notochord-somite boundary. *Dev. Dyn.* **235**, 1974-1983.
- Skoglund, P., Rolo, A., Chen, X., Gumbiner, B. M. and Keller, R. (2008). Convergence and extension at gastrulation require a myosin IIB-dependent cortical actin network. *Development* **135**, 2435-2444.
- Solnica-Krezel, L. (2005). Conserved patterns of cell movements during vertebrate gastrulation. *Curr. Biol.* **15**, R213-R228.
- Solnica-Krezel, L. (2006). Gastrulation in zebrafish: all just about adhesion? *Curr. Opin. Genet. Dev.* **16**, 433-441.
- Steinberg, M. S. (1996). Adhesion in development: an historical overview. *Dev. Biol.* **180**, 377-388.
- Steinberg, M. S. (2007). Differential adhesion in morphogenesis: a modern view. *Curr. Opin. Genet. Dev.* **17**, 281-286.
- Stephens, L. E., Sutherland, A. E., Klimanskaya, I. V., Andrieux, A., Meneses, J., Pedersen, R. A. and Damsky, C. H. (1995). Deletion of beta 1 integrins in mice results in inner cell mass failure and peri-implantation lethality. *Genes Dev.* **9**, 1883-1895.
- Strutt, H. and Strutt, D. (2005). Long-range coordination of planar polarity in *Drosophila*. *BioEssays* **27**, 1218-1227.
- Tahinci, E. and Symes, K. (2003). Distinct functions of Rho and Rac are required for convergent extension during *Xenopus* gastrulation. *Dev. Biol.* **259**, 318-335.
- Tanegashima, K., Zhao, H. and Dawid, I. B. (2008). WGEF activates Rho in the Wnt-PCP pathway and controls convergent extension in *Xenopus* gastrulation. *EMBO J.* **27**, 606-617.
- Tepass, U., Gruszynski-DeFeo, E., Haag, T. A., Omatyar, L., Torok, T. and Hartenstein, V. (1996). Shotgun encodes *Drosophila* E-cadherin and is preferentially required during cell rearrangement in the neuroectoderm and other morphogenetically active epithelia. *Genes Dev.* **10**, 672-685.
- Topczewski, J., Sepich, D. S., Myers, D. C., Walker, C., Amores, A., Lele, Z., Hammerschmidt, M., Postlethwait, J. and Solnica-Krezel, L. (2001). The zebrafish glypican knypek controls cell polarity during gastrulation movements of convergent extension. *Dev. Cell* **1**, 251-264.
- Townes, P. L. and Holtfreter, J. (1955). Directed movement and selective adhesion of embryonic cells. *J. Exp. Zool.* **128**, 53-118.
- Trinh, L. A. and Stainier, D. Y. (2004). Fibronectin regulates epithelial organization during myocardial migration in zebrafish. *Dev. Cell* **6**, 371-382.
- Ulrich, F., Krieg, M., Schotz, E. M., Link, V., Castanon, I., Schnabel, V., Taubenberger, A., Mueller, D., Puech, P. H. and Heisenberg, C. P. (2005). Wnt11 functions in gastrulation by controlling cell cohesion through Rab5c and E-cadherin. *Dev. Cell* **9**, 555-564.
- Unterseher, F., Hefele, J. A., Giehl, K., De Robertis, E. M., Wedlich, D. and Schambony, A. (2004). Paraxial protocadherin coordinates cell polarity during convergent extension via Rho A and JNK. *EMBO J.* **23**, 3259-3269.
- Usui, T., Shima, Y., Shimada, Y., Hirano, S., Burgess, R. W., Schwarz, T. L., Takeichi, M. and Uemura, T. (1999). Flamingo, a seven-pass transmembrane cadherin, regulates planar cell polarity under the control of Frizzled. *Cell* **98**, 585-595.
- Van Aelst, L. and Symons, M. (2002). Role of Rho family GTPases in epithelial morphogenesis. *Genes Dev.* **16**, 1032-1054.
- Voiculescu, O., Bertocchini, F., Wolpert, L., Keller, R. E. and Stern, C. D. (2007). The amniote primitive streak is defined by epithelial cell intercalation before gastrulation. *Nature* **449**, 1049-1052.
- von der Hardt, S., Bakkers, J., Inbal, A., Carvalho, L., Solnica-Krezel, L., Heisenberg, C. P. and Hammerschmidt, M. (2007). The Bmp gradient of the zebrafish gastrula guides migrating lateral cells by regulating cell-cell adhesion. *Curr. Biol.* **17**, 475-487.
- Wacker, S., Grimm, K., Joos, T. and Winklbauer, R. (2000). Development and control of tissue separation at gastrulation in *Xenopus*. *Dev. Biol.* **224**, 428-439.
- Wallingford, J. B. and Harland, R. M. (2007). Vertebrate gastrulation: the BMP sticker shock. *Curr. Biol.* **17**, R206-R209.
- Wallingford, J. B., Fraser, S. E. and Harland, R. M. (2002). Convergent extension: the molecular control of polarized cell movement during embryonic development. *Dev. Cell* **2**, 695-706.
- Wang, F., Dumstrei, K., Haag, T. and Hartenstein, V. (2004). The role of DE-cadherin during cellularization, germ layer formation and early neurogenesis in the *Drosophila* embryo. *Dev. Biol.* **270**, 350-363.
- Wang, Y., Janicki, P., Koster, I., Berger, C. D., Wenzl, C., Grosshans, J. and Steinbeisser, H. (2008). *Xenopus* Paraxial Protocadherin regulates morphogenesis by antagonizing Sprouty. *Genes Dev.* **22**, 878-883.
- Warga, R. M. and Kane, D. A. (2007). A role for N-cadherin in mesodermal morphogenesis during gastrulation. *Dev. Biol.* **310**, 211-225.
- Warga, R. M. and Kimmel, C. B. (1990). Cell movements during epiboly and gastrulation in zebrafish. *Development* **108**, 569-580.
- Warnock, D. E. and Schmid, S. L. (1996). Dynamins GTPase, a force-generating molecular switch. *BioEssays* **18**, 885-893.
- Webb, D. J., Parsons, J. T. and Horwitz, A. F. (2002). Adhesion assembly,



- disassembly and turnover in migrating cells: over and over and over again. *Nat. Cell Biol.* **4**, E97-E100.
- Webb, D. J., Brown, C. M. and Horwitz, A. F.** (2003). Illuminating adhesion complexes in migrating cells: moving toward a bright future. *Curr. Opin. Cell Biol.* **15**, 614-620.
- Weis, W. I. and Nelson, W. J.** (2006). Re-solving the cadherin-catenin-actin conundrum. *J. Biol. Chem.* **281**, 35593-35597.
- Weiser, D. C., Pyati, U. J. and Kimelman, D.** (2007). Gravin regulates mesodermal cell behavior changes required for axis elongation during zebrafish gastrulation. *Genes Dev.* **21**, 1559-1571.
- Wilson, P. and Keller, R.** (1991). Cell rearrangement during gastrulation of *Xenopus*: direct observation of cultured explants. *Development* **112**, 289-300.
- Winklbauer, R.** (1998). Conditions for fibronectin fibril formation in the early *Xenopus* embryo. *Dev. Dyn.* **212**, 335-345.
- Winklbauer, R. and Keller, R. E.** (1996). Fibronectin, mesoderm migration, and gastrulation in *Xenopus*. *Dev. Biol.* **177**, 413-426.
- Winklbauer, R. and Nagel, M.** (1991). Directional mesoderm cell migration in the *Xenopus* gastrula. *Dev. Biol.* **148**, 573-589.
- Winklbauer, R., Selchow, A., Nagel, M. and Angres, B.** (1992). Cell interaction and its role in mesoderm cell migration during *Xenopus* gastrulation. *Dev. Dyn.* **195**, 290-302.
- Winklbauer, R., Medina, A., Swain, R. K. and Steinbeisser, H.** (2001). Frizzled-7 signalling controls tissue separation during *Xenopus* gastrulation. *Nature* **413**, 856-860.
- Witzel, S., Zimyanin, V., Carreira-Barbosa, F., Tada, M. and Heisenberg, C. P.** (2006). Wnt11 controls cell contact persistence by local accumulation of Frizzled 7 at the plasma membrane. *J. Cell Biol.* **175**, 791-802.
- Wunnenberg-Stapleton, K., Blitz, I. L., Hashimoto, C. and Cho, K. W.** (1999). Involvement of the small GTPases XRhoA and XRnd1 in cell adhesion and head formation in early *Xenopus* development. *Development* **126**, 5339-5351.
- Yamamoto, A., Amacher, S. L., Kim, S. H., Geissert, D., Kimmel, C. B. and De Robertis, E. M.** (1998). Zebrafish paraxial protocadherin is a downstream target of spadetail involved in morphogenesis of gastrula mesoderm. *Development* **125**, 3389-3397.
- Yamanaka, H., Moriguchi, T., Masuyama, N., Kusakabe, M., Hanafusa, H., Takada, R., Takada, S. and Nishida, E.** (2002). JNK functions in the non-canonical Wnt pathway to regulate convergent extension movements in vertebrates. *EMBO Rep.* **3**, 69-75.
- Yamashita, S., Miyagi, C., Fukada, T., Kagara, N., Che, Y. S. and Hirano, T.** (2004). Zinc transporter LIV1 controls epithelial-mesenchymal transition in zebrafish gastrula organizer. *Nature* **429**, 298-302.
- Yap, A. S., Crompton, M. S. and Hardin, J.** (2007). Making and breaking contacts: the cellular biology of cadherin regulation. *Curr. Opin. Cell Biol.* **19**, 508-514.
- Yimlamai, D., Konnikova, L., Moss, L. G. and Jay, D. G.** (2005). The zebrafish down syndrome cell adhesion molecule is involved in cell movement during embryogenesis. *Dev. Biol.* **279**, 44-57.
- Yin, C., Kiskowski, M., Pouille, P. A., Farge, E. and Solnica-Krezel, L.** (2008). Cooperation of polarized cell intercalations drives convergence and extension of presomitic mesoderm during zebrafish gastrulation. *J. Cell Biol.* **180**, 221-232.
- Young, P. E., Pesacreta, T. C. and Kiehart, D. P.** (1991). Dynamic changes in the distribution of cytoplasmic myosin during *Drosophila* embryogenesis. *Development* **111**, 1-14.
- Zaidel-Bar, R., Itzkovitz, S., Ma'ayan, A., Iyengar, R. and Geiger, B.** (2007). Functional atlas of the integrin adhesome. *Nat. Cell Biol.* **9**, 858-867.
- Zallen, J. A. and Wieschaus, E.** (2004). Patterned gene expression directs bipolar planar polarity in *Drosophila*. *Dev. Cell* **6**, 343-355.
- Zamir, E. A., Czirok, A., Cui, C., Little, C. D. and Rongish, B. J.** (2006). Mesodermal cell displacements during avian gastrulation are due to both individual cell-autonomous and convective tissue movements. *Proc. Natl. Acad. Sci. USA* **103**, 19806-19811.
- Zeng, X. X., Wilm, T. P., Sepich, D. S. and Solnica-Krezel, L.** (2007). Apelin and its receptor control heart field formation during zebrafish gastrulation. *Dev. Cell* **12**, 391-402.
- Zohn, I. E., Li, Y., Skolnik, E. Y., Anderson, K. V., Han, J. and Niswander, L.** (2006). p38 and a p38-interacting protein are critical for downregulation of E-cadherin during mouse gastrulation. *Cell* **125**, 957-969.
